# Supplementary material
Source: publisher figshare collection journal article supplement (https://acs.figshare.com/ndownloader/files/4068697)
Supplement: Supplementary file 1 [file 4068697]

Supporting Information to:

*meso*-Tetraphenyl-2-oxabacteriochlorins and  
*meso*-Tetraphenyl-2,12/13-dioxabacteriochlorins

*Junichi Ogikubo,<sup>†</sup> Eileen Meehan,<sup>†</sup>*

*James T. Engle,<sup>\*</sup> Christopher J. Ziegler,<sup>\*</sup> and Christian Brückner<sup>†,\*</sup>*

Department of Chemistry, University of Connecticut, Storrs, CT 06269-3060,  
United States.

Department of Chemistry, University of Akron, Akron, OH 44325-3601, United  
States.

Author to whom inquiries should be addressed to: [c.bruckner@uconn.edu](mailto:c.bruckner@uconn.edu)

## Table of Contents:

|                                                                                                                |    |
|----------------------------------------------------------------------------------------------------------------|----|
| <b>Figure 1.</b> $^1\text{H}$ NMR spectrum (400 $\text{CDCl}_3$ , $\text{CDCl}_3$ ) of <b>13</b>               | 4  |
| <b>Figure 2.</b> $^{13}\text{C}$ NMR spectrum (100 MHz, $\text{CDCl}_3$ ) of <b>13</b>                         | 4  |
| <b>Figure 3.</b> UV-vis and fluorescence spectra of <b>13</b> ( $\text{CH}_2\text{Cl}_2$ )                     | 5  |
| <b>Figure 4.</b> FT-IR spectrum (neat, diffuse reflectance) of <b>13</b>                                       | 5  |
| <b>Figure 5.</b> $^1\text{H}$ NMR spectrum (400 MHz, $\text{CDCl}_3$ ) of <b>14-cis</b>                        | 6  |
| <b>Figure 6.</b> $^{13}\text{C}$ NMR spectrum (100 MHz, $\text{CDCl}_3$ ) of <b>14-cis</b>                     | 6  |
| <b>Figure 7.</b> UV-vis and fluorescence spectra of <b>14-cis</b> ( $\text{CH}_2\text{Cl}_2$ )                 | 7  |
| <b>Figure 8.</b> FT-IR spectrum (neat, diffuse reflectance) of <b>14-cis</b>                                   | 7  |
| <b>Figure 9.</b> $^1\text{H}$ NMR spectrum (400 MHz, $\text{CDCl}_3$ ) of <b>15</b>                            | 8  |
| <b>Figure 10.</b> $^{13}\text{C}$ NMR spectrum (100 MHz, $\text{CDCl}_3$ ) of <b>15</b>                        | 8  |
| <b>Figure 11.</b> UV-vis and fluorescence spectra of <b>15</b> ( $\text{CH}_2\text{Cl}_2$ )                    | 9  |
| <b>Figure 12.</b> $^1\text{H}$ NMR spectrum (400 MHz, $\text{CDCl}_3$ ) of <b>17</b>                           | 9  |
| <b>Figure 13.</b> $^{13}\text{C}$ NMR spectrum (100 MHz, $\text{CDCl}_3$ ) of <b>17</b>                        | 10 |
| <b>Figure 14.</b> UV-vis and fluorescence spectra of <b>17</b> ( $\text{CHCl}_3$ )                             | 10 |
| <b>Figure 15.</b> $^1\text{H}$ NMR spectrum (400 MHz, $\text{CDCl}_3$ ) of <b>16-cis</b>                       | 11 |
| <b>Figure 16.</b> $^{13}\text{C}$ NMR spectrum (100 MHz, $\text{CDCl}_3$ ) of <b>16-cis</b>                    | 11 |
| <b>Figure 17.</b> UV-vis and fluorescence spectra of <b>16-cis</b> ( $\text{CH}_2\text{Cl}_2$ )                | 12 |
| <b>Figure 18.</b> FT-IR spectrum (neat, diffuse reflectance) of <b>16-cis</b>                                  | 12 |
| <b>Figure 19.</b> $^1\text{H}$ NMR spectrum (400 MHz, $\text{CDCl}_3$ ) of <b>16Zn-cis</b>                     | 13 |
| <b>Figure 20.</b> $^{13}\text{C}$ NMR spectrum (100 MHz, $\text{CDCl}_3$ ) of <b>16Zn-cis</b>                  | 13 |
| <b>Figure 21.</b> UV-vis and fluorescence spectra of <b>16Zn-cis</b> ( $\text{CH}_2\text{Cl}_2$ )              | 14 |
| <b>Figure 22.</b> FT-IR spectrum (neat, diffuse reflectance) of <b>16Zn-cis</b>                                | 14 |
| <b>Figure 23.</b> $^1\text{H}$ NMR spectrum (400 MHz, $\text{CDCl}_3$ ) of <b>18-cis</b>                       | 15 |
| <b>Figure 24.</b> $^{13}\text{C}$ NMR spectrum (100 MHz, $\text{CDCl}_3$ ) of <b>18-cis</b>                    | 15 |
| <b>Figure 25.</b> UV-vis and fluorescence spectra of <b>18-cis</b> ( $\text{CH}_2\text{Cl}_2$ )                | 16 |
| <b>Figure 26.</b> FT-IR spectrum (neat, diffuse reflectance) of <b>18-cis</b>                                  | 16 |
| <b>Figure 27.</b> $^1\text{H}$ NMR spectrum (400 MHz, $\text{CDCl}_3$ ) of <b>19-cis</b>                       | 17 |
| <b>Figure 28.</b> $^{13}\text{C}$ NMR spectrum (100 MHz, $\text{CDCl}_3$ ) of <b>19-cis</b>                    | 17 |
| <b>Figure 29.</b> UV-vis and fluorescence spectra of <b>19-cis</b> ( $\text{CH}_2\text{Cl}_2$ )                | 18 |
| <b>Figure 30.</b> FT-IR spectrum (neat, diffuse reflectance) of <b>19-cis</b>                                  | 18 |
| <b>Figure 31.</b> $^1\text{H}$ NMR spectrum (400 MHz, $\text{CDCl}_3$ ) of <b>25</b> (mixture of all isomers+) | 19 |

|                                                                                                                                                                             |    |
|-----------------------------------------------------------------------------------------------------------------------------------------------------------------------------|----|
| <b>Figure 32.</b> $^{13}\text{C}$ NMR spectrum (100 MHz, $\text{CDCl}_3$ ) of <b>23</b> (mixture of all isomers)                                                            | 19 |
| <b>Figure 33.</b> UV-vis spectrum of <b>23</b> ( $\text{CH}_2\text{Cl}_2$ , mixture of all isomers)                                                                         | 20 |
| <b>Figure 34.</b> $^1\text{H}$ NMR spectrum (400 MHz, $\text{CDCl}_3$ ) of <b>22-cis</b> / <b>trans</b> ( $\text{CH}_2\text{Cl}_2$ ), mixture, 3:2 favoring <b>22-cis</b> ) | 20 |
| <b>Figure 35.</b> $^{13}\text{C}$ NMR spectrum (100 MHz, $\text{CDCl}_3$ ) of <b>22-cis</b> / <b>trans</b> (mixture, 3:2 favoring <b>22-cis</b> )                           | 21 |
| <b>Figure 36.</b> UV-vis spectrum of <b>22-cis</b> / <b>trans</b> ( $\text{CH}_2\text{Cl}_2$ , mixture, 3:2 favoring <b>22-cis</b> )                                        | 21 |
| <b>Figure 37.</b> $^1\text{H}$ NMR spectrum (500 MHz, $\text{CDCl}_3$ ) of <b>24</b>                                                                                        | 22 |
| <b>Figure 38.</b> $^{13}\text{C}$ NMR spectrum (100 MHz, $\text{CDCl}_3$ ) of <b>24</b>                                                                                     | 22 |
| <b>Figure 39.</b> UV-vis spectrum of <b>24</b> ( $\text{CH}_2\text{Cl}_2$ )                                                                                                 | 23 |
| <b>Crystal Structure Report for 14-cis</b>                                                                                                                                  | 24 |
| <b>Figure 40.</b> ORTEP Representation of the crystal structure of <b>14-cis</b> , side and top views. Hydrogen atoms and disorder removed for clarity.                     | 25 |
| <b>Table S1.</b> Crystal data and structure refinement for <b>14-cis</b> .                                                                                                  | 40 |
| <b>Crystal Structure Report for 16-cis</b>                                                                                                                                  | 27 |
| <b>Figure 41.</b> ORTEP Representation of the crystal structure of <b>16-cis</b> , side and top views. Hydrogen atoms and disorder removed for clarity.                     | 28 |
| <b>Table S2.</b> Crystal data and structure refinement for <b>16-cis</b>                                                                                                    | 40 |
| <b>Crystal Structure Report for 16Zn-cis</b>                                                                                                                                | 30 |
| <b>Figure 42.</b> ORTEP Representation of the crystal structure of <b>16Zn-cis</b> , side and top views. Hydrogen atoms and disorder removed for clarity.                   | 31 |
| <b>Table S3.</b> Crystal data and structure refinement for <b>16Zn-cis</b>                                                                                                  | 40 |
| <b>Crystal Structure Report for 23-trans-E</b>                                                                                                                              | 33 |
| <b>Figure 43.</b> ORTEP Representation of the crystal structure of <b>22-trans-E</b> , side and top views. Hydrogen atoms and disorder removed for clarity.                 | 34 |
| <b>Table S4.</b> Crystal data and structure refinement for <b>22-trans-E</b>                                                                                                | 40 |
| <b>Crystal Structure Report for 23-trans-Z</b>                                                                                                                              | 36 |
| <b>Figure 44.</b> ORTEP Representation of the crystal structure of <b>23-trans-E</b> , side and top views. Hydrogen atoms and disorder removed for clarity.                 | 37 |
| <b>Table S5.</b> Crystal data and structure refinement for <b>23-trans-E</b>                                                                                                | 40 |
| <b>Crystal Structure Report for 22-cis</b>                                                                                                                                  | 39 |
| <b>Figure 45.</b> ORTEP Representation of the crystal structure of <b>22-cis</b> , side and top views. Hydrogen atoms and disorder removed for clarity.                     | 40 |
| <b>Table S6.</b> Crystal data and structure refinement for <b>22-cis</b> .                                                                                                  | 41 |

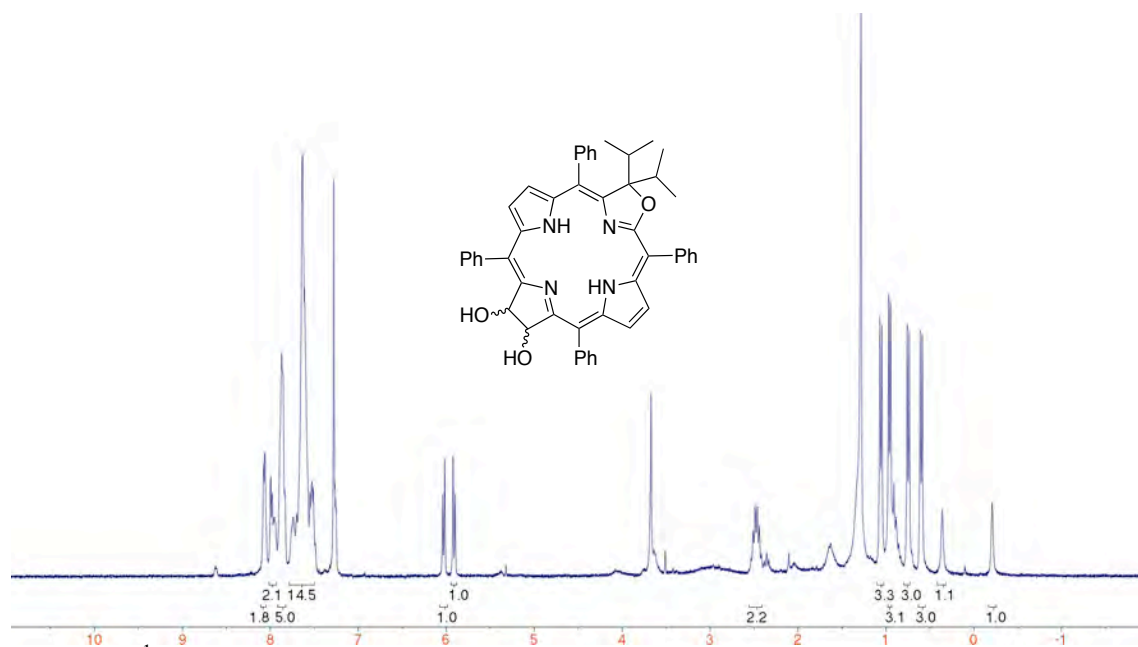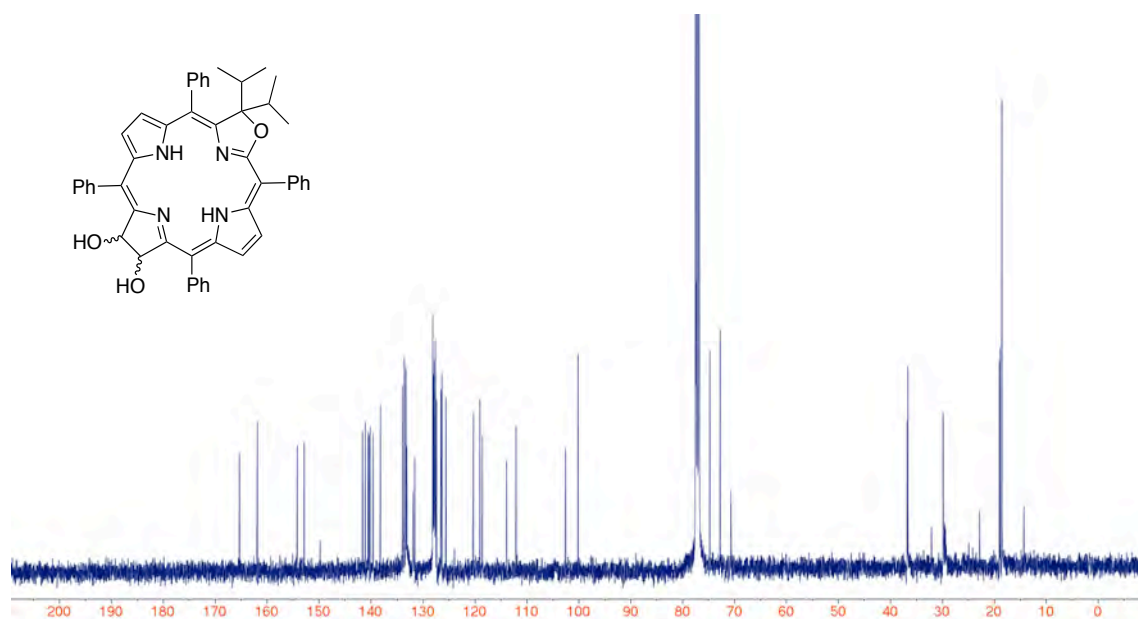

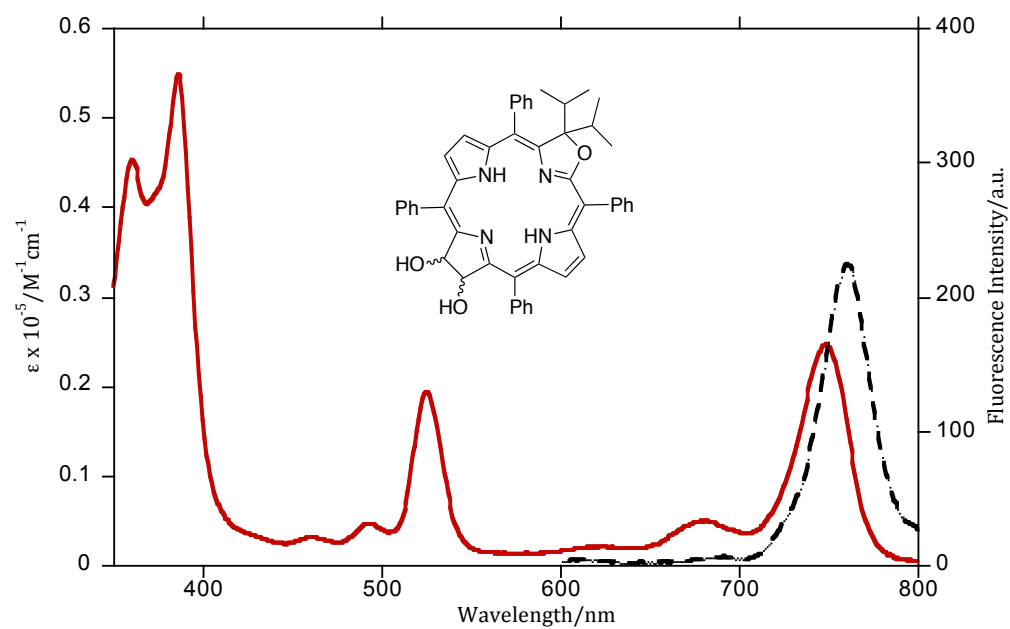

**Figure 3.** UV-vis (solid red trace) and fluorescence (broken black trace) spectra of **13** ( $\text{CH}_2\text{Cl}_2$ )

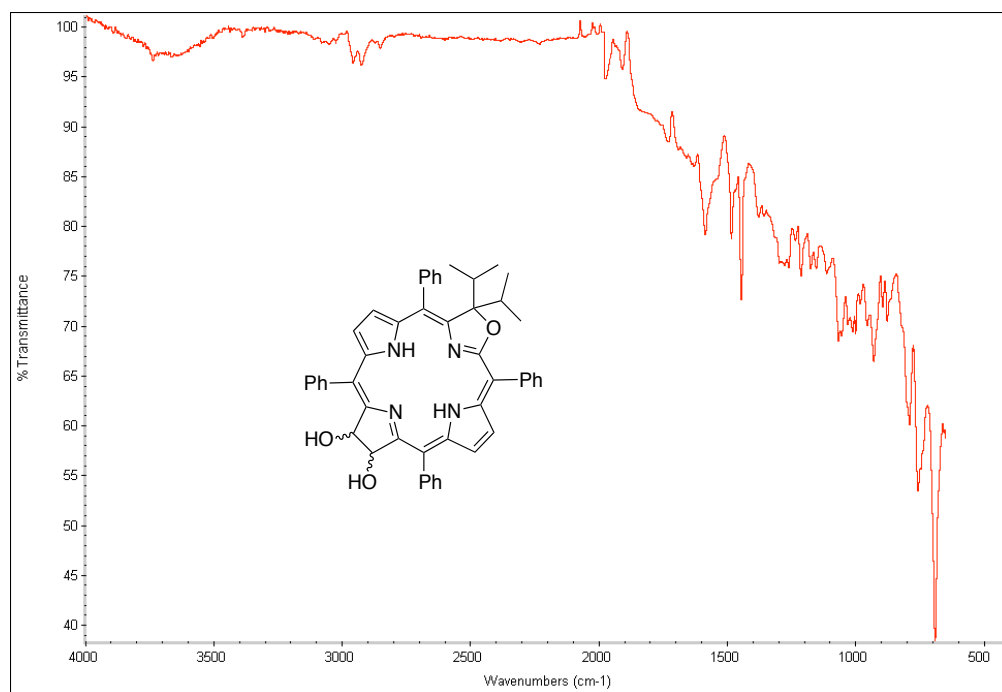

**Figure 4.** FT-IR spectrum (neat, diffuse reflectance) of **13**

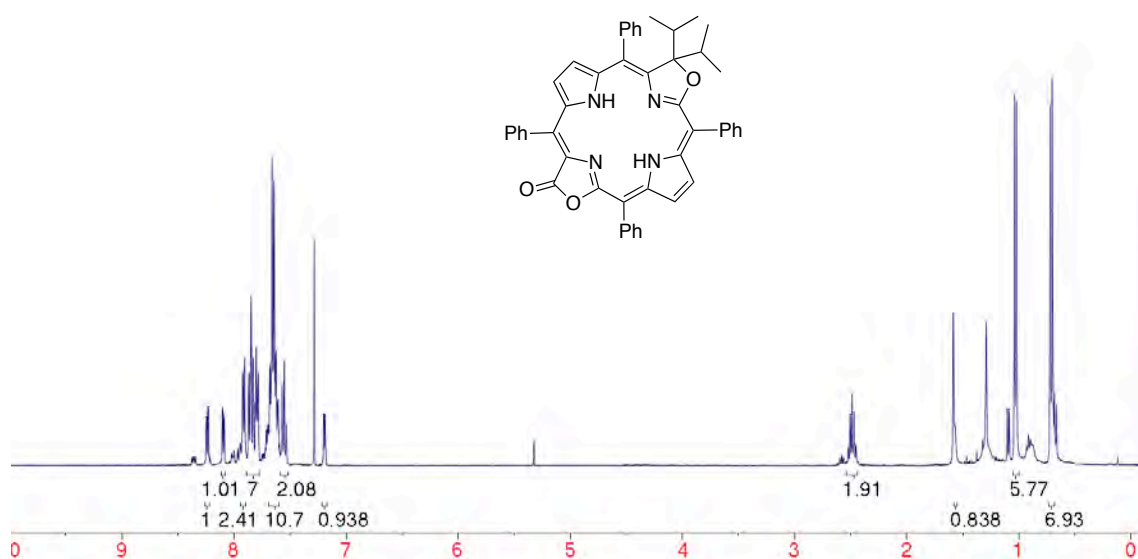

**Figure 5.** <sup>1</sup>H NMR spectrum (400 MHz, CDCl<sub>3</sub>) of **14-cis**

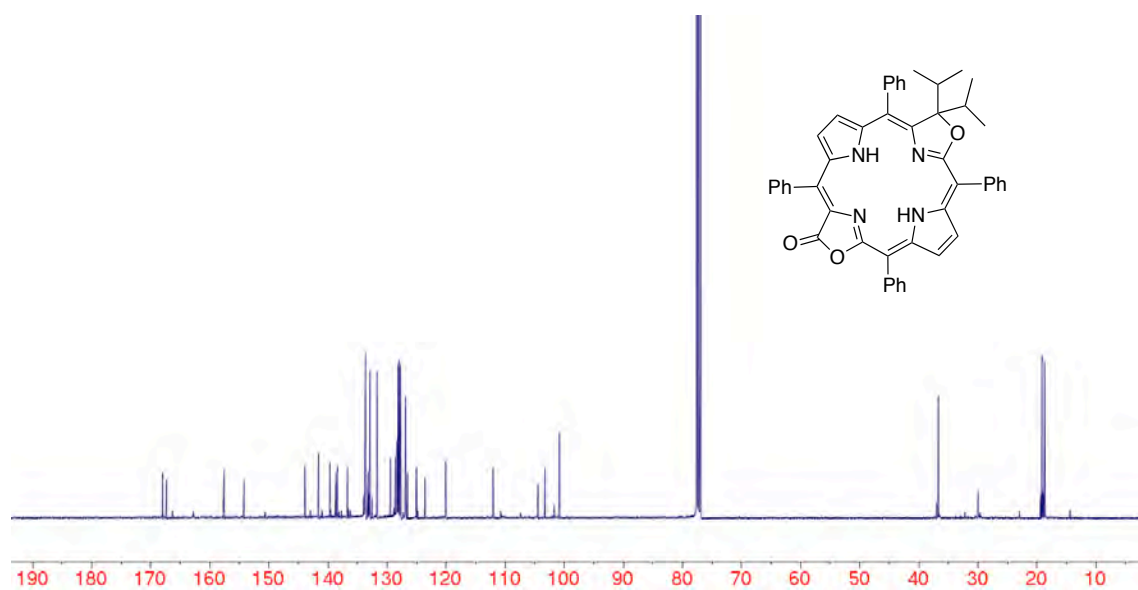

**Figure 6.** <sup>13</sup>C NMR spectrum (100 MHz, CDCl<sub>3</sub>) of **14-cis**

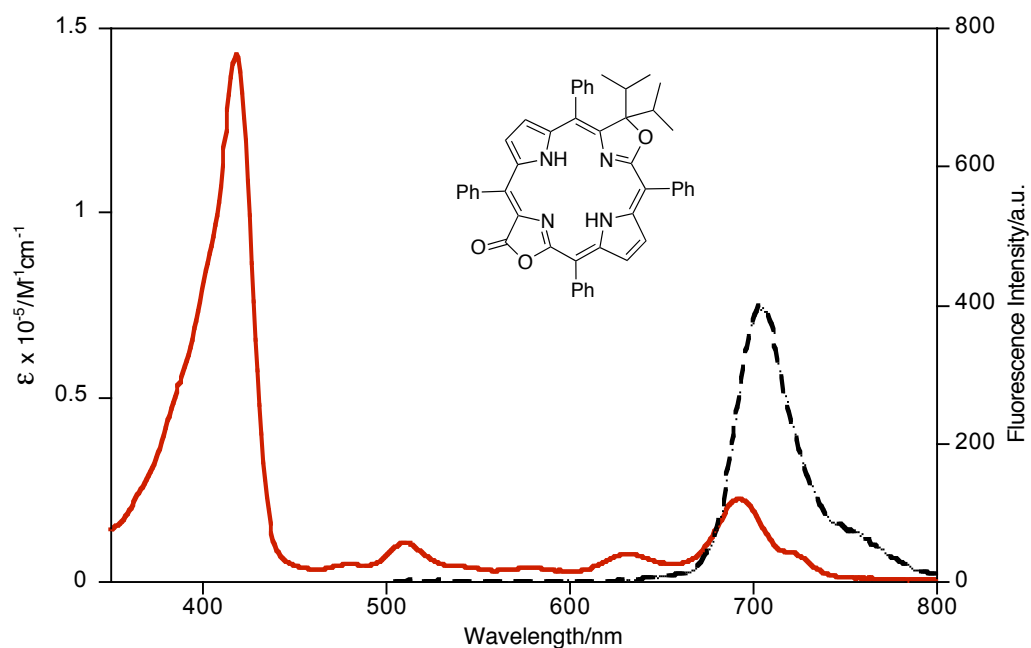

**Figure 7.** UV-vis (solid red trace) and fluorescence (broken black trace) spectra of **14-cis** ( $\text{CH}_2\text{Cl}_2$ )

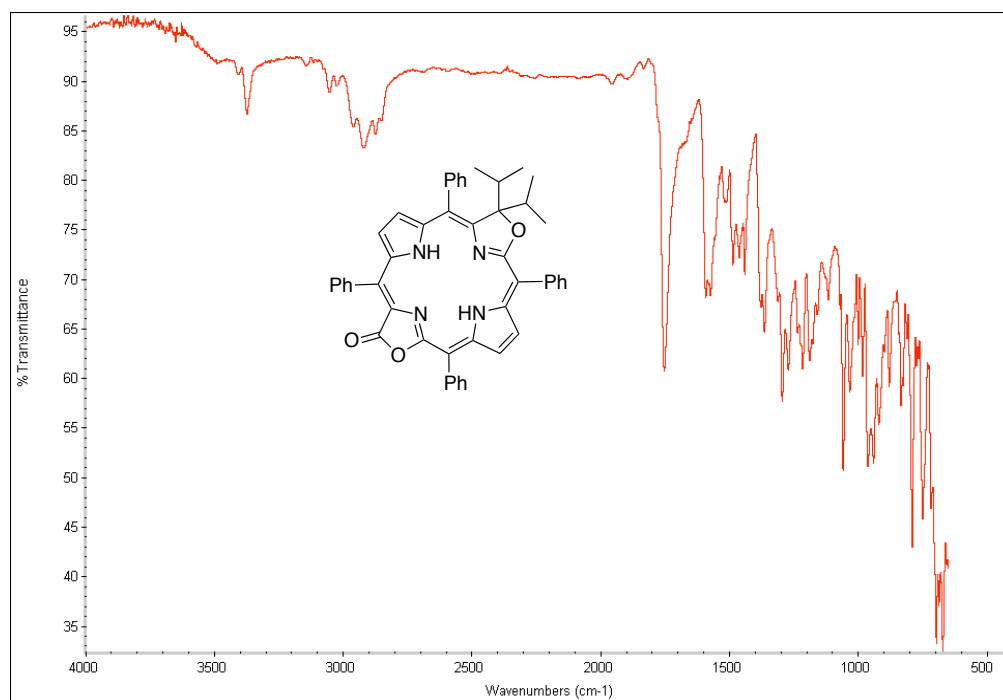

**Figure 8.** FT-IR spectrum (neat, diffuse reflectance) of **14-cis**

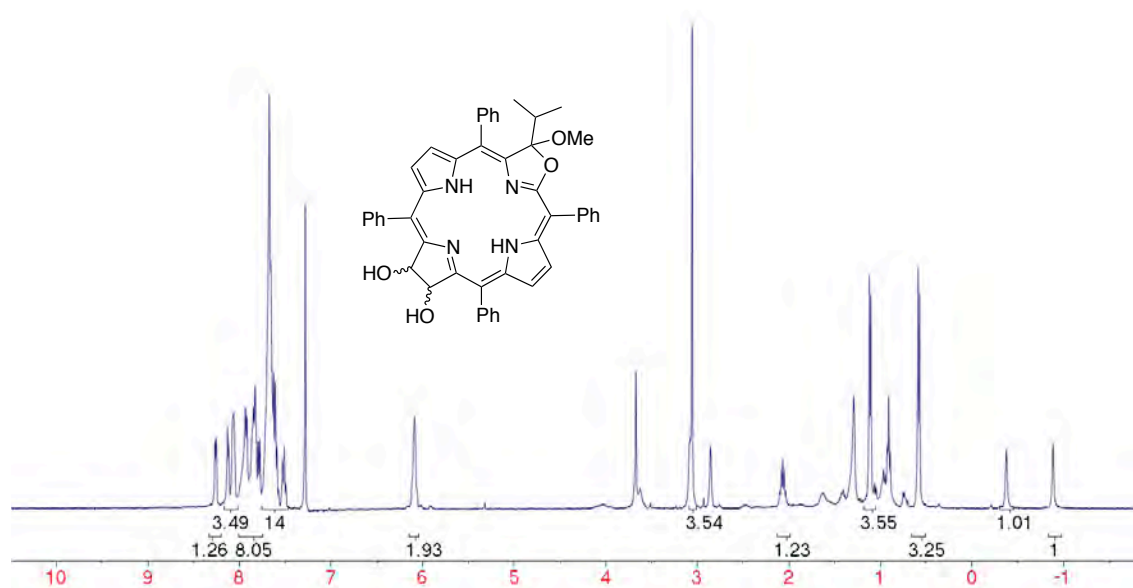

**Figure 9.**  $^1\text{H}$  NMR spectrum (400 MHz,  $\text{CDCl}_3$ ) of **15**

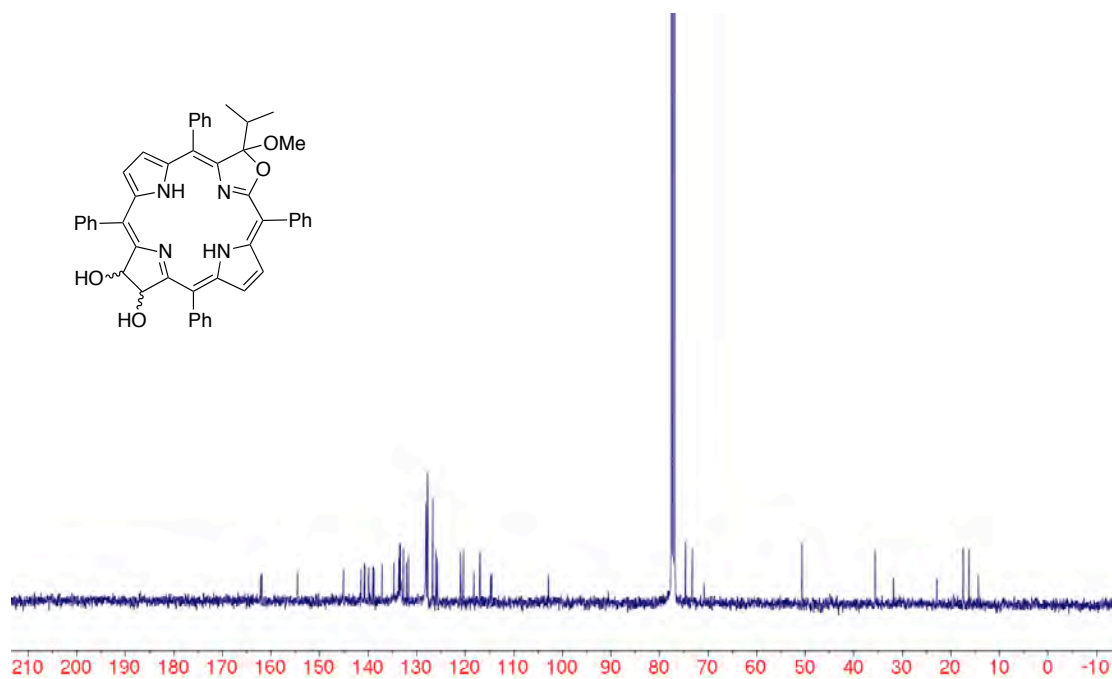

**Figure 10.**  $^{13}\text{C}$  NMR spectrum (100 MHz,  $\text{CDCl}_3$ ) of **15**



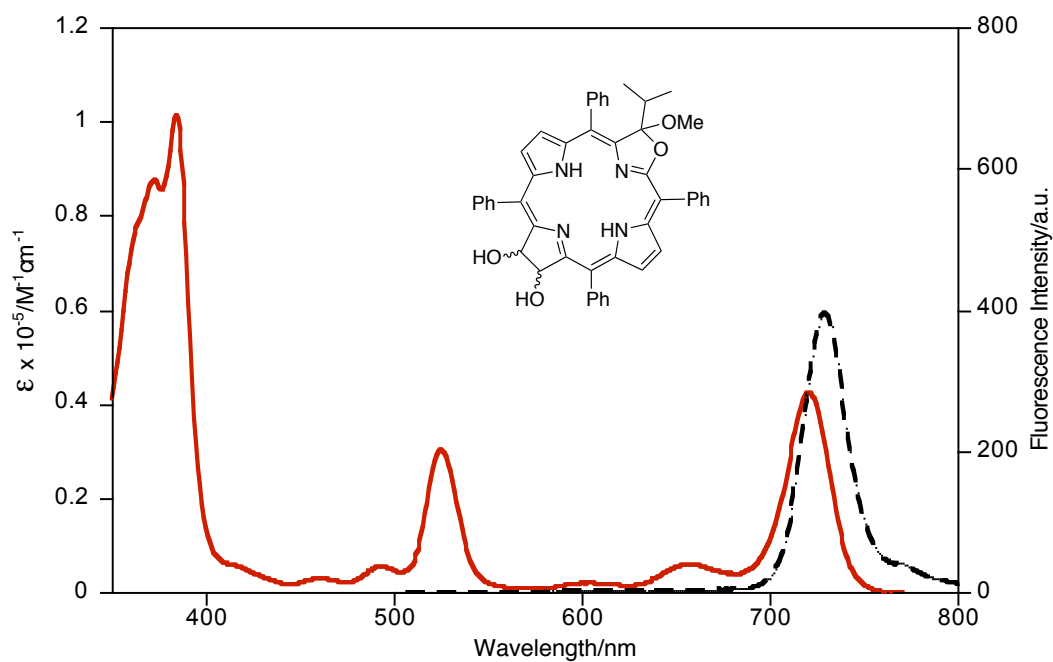

**Figure 11.** UV-vis (solid red trace) and fluorescence (broken black trace) spectra of **15** ( $\text{CH}_2\text{Cl}_2$ )

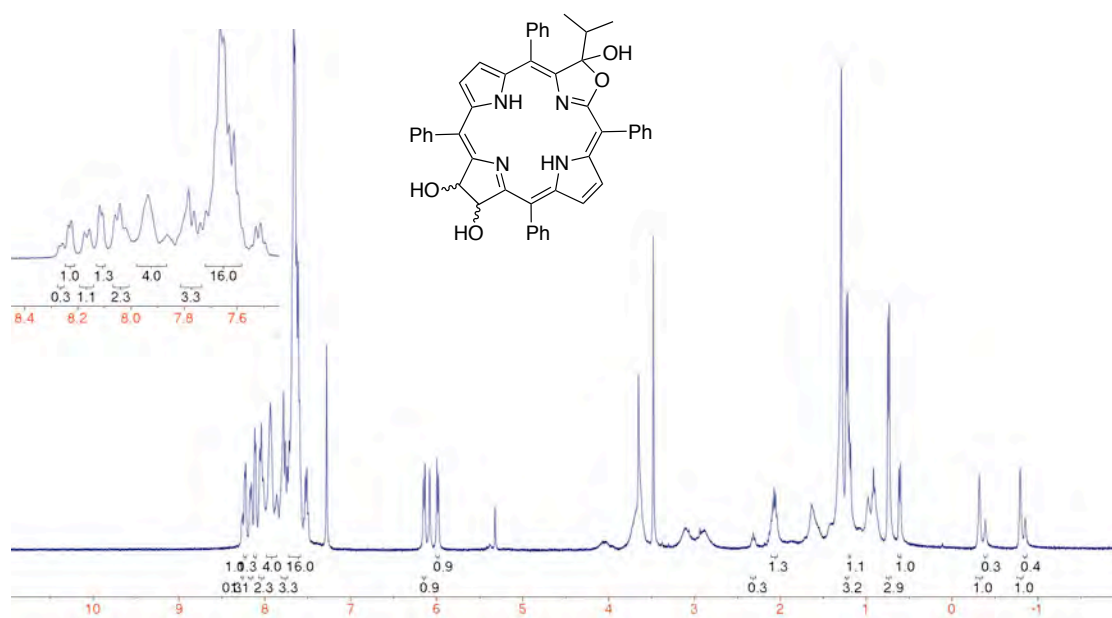

**Figure 12.**  $^1\text{H}$  NMR spectrum (400 MHz,  $\text{CDCl}_3$ ) of **17**

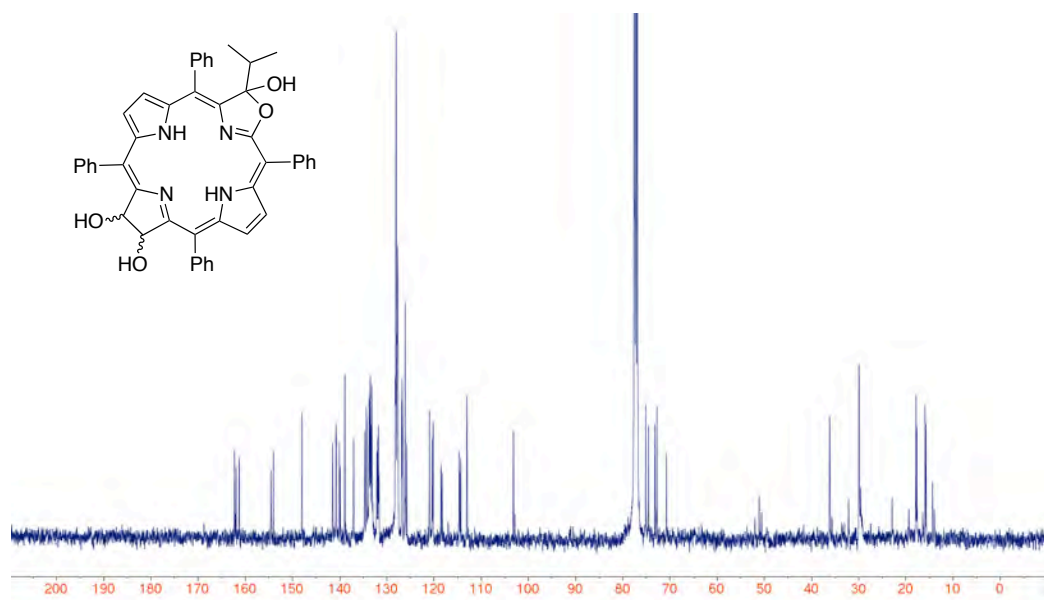

**Figure 13.**  $^{13}\text{C}$  NMR spectrum (100 MHz,  $\text{CDCl}_3$ ) of **17**

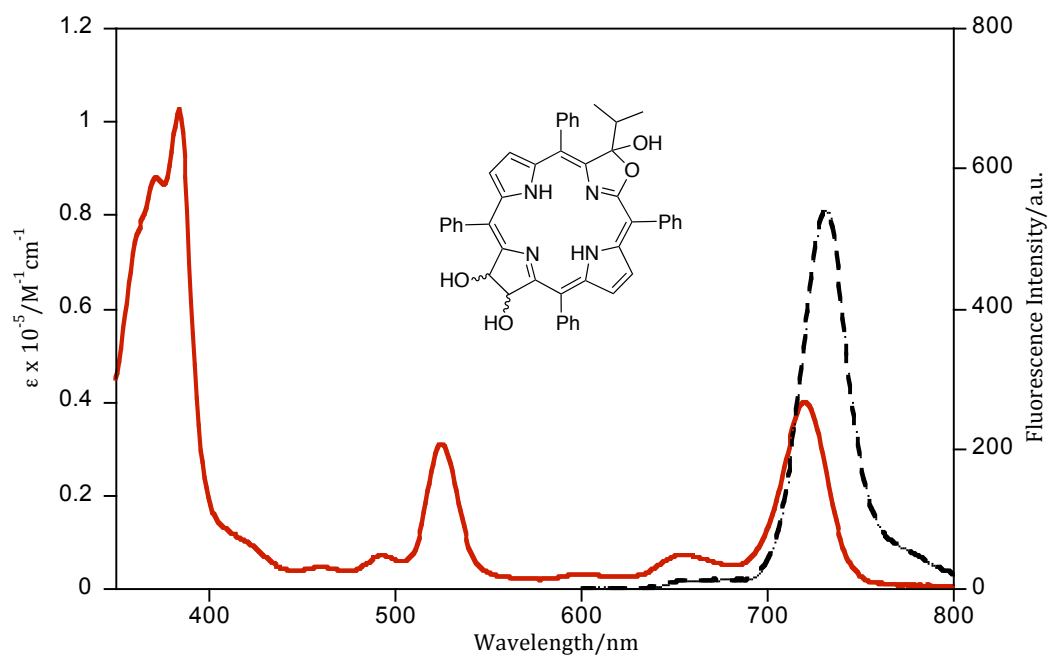

**Figure 14.** UV-vis (solid red trace) and fluorescence (broken black trace) spectra of **17** ( $\text{CHCl}_3$ )

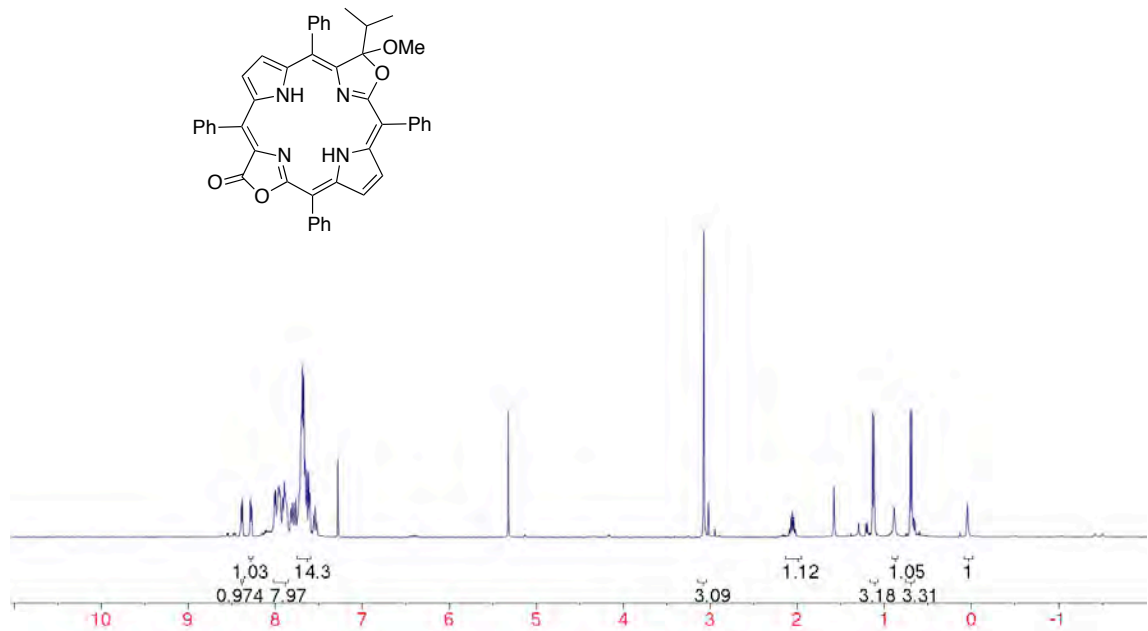

**Figure 15.**  $^1\text{H}$  NMR spectrum (400 MHz,  $\text{CDCl}_3$ ) of **16-cis**

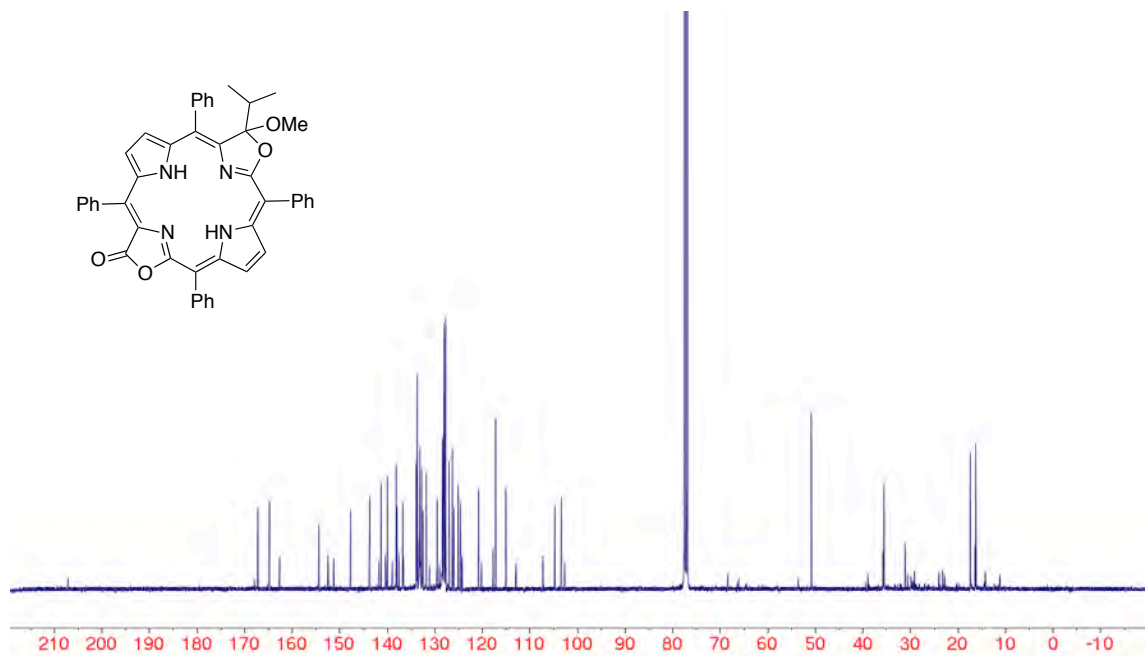

**Figure 16.**  $^{13}\text{C}$  NMR spectrum (100 MHz,  $\text{CDCl}_3$ ) of **16-cis**

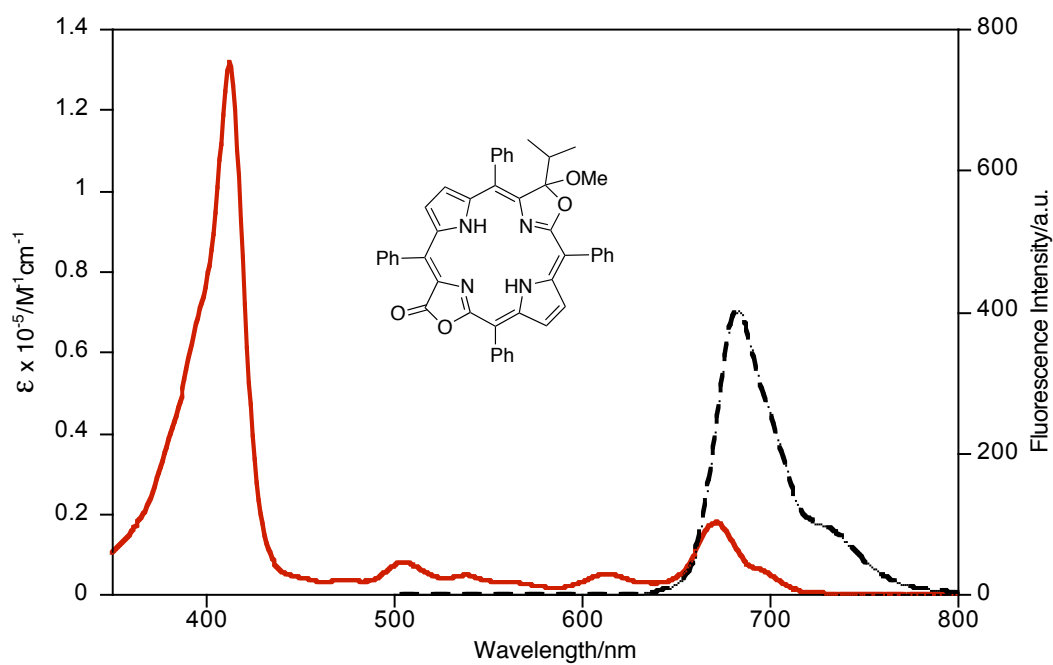

**Figure 17.** UV-vis (solid red trace) and fluorescence (broken black trace) spectra of **16-cis** ( $\text{CH}_2\text{Cl}_2$ )

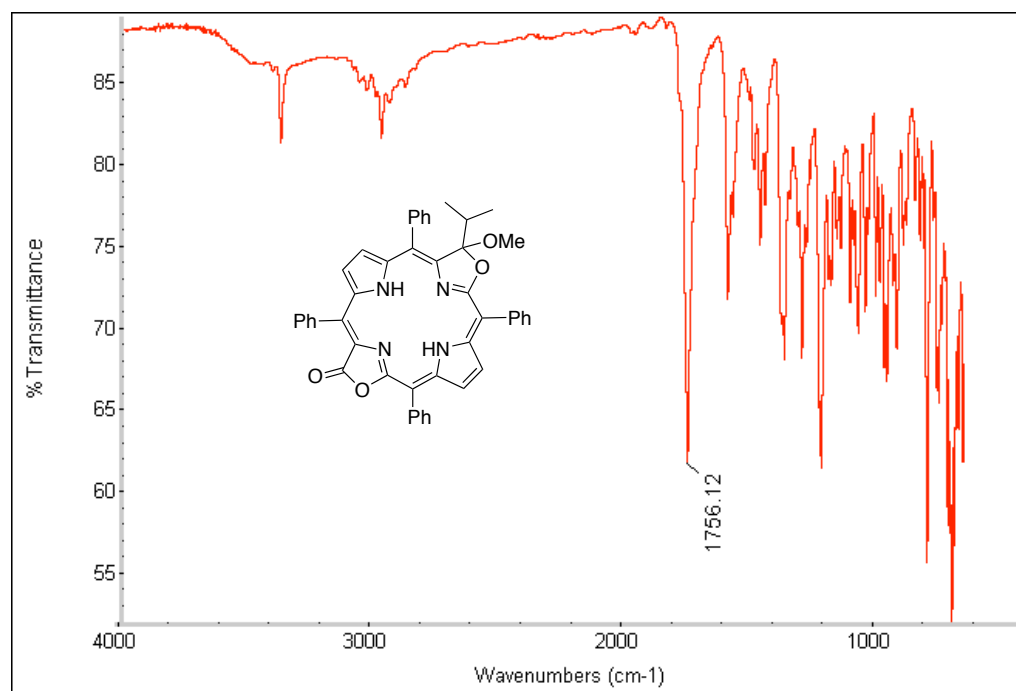

**Figure 18.** FT-IR spectrum (neat, diffuse reflectance) of **16-cis**

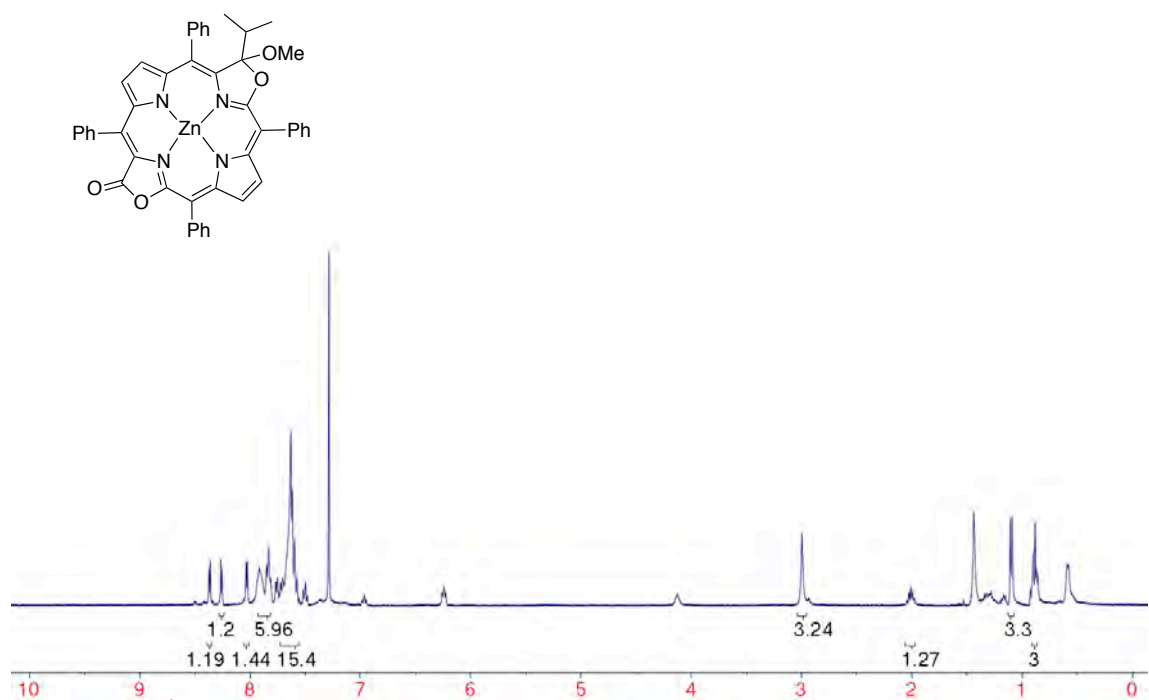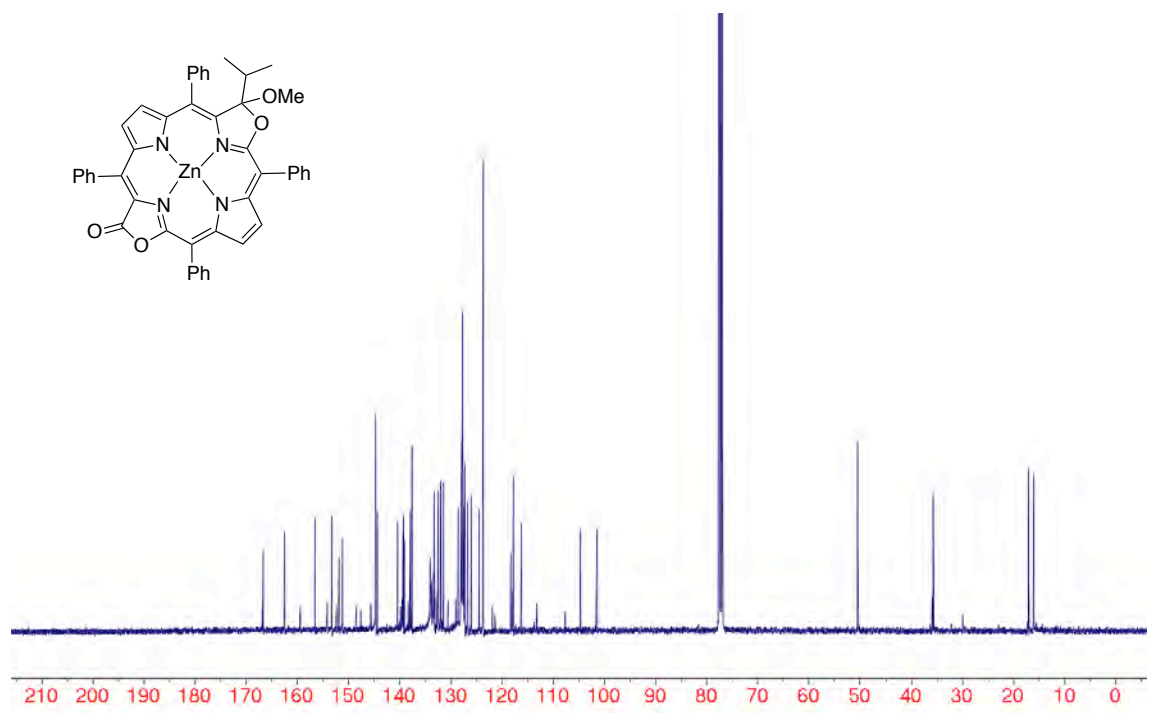

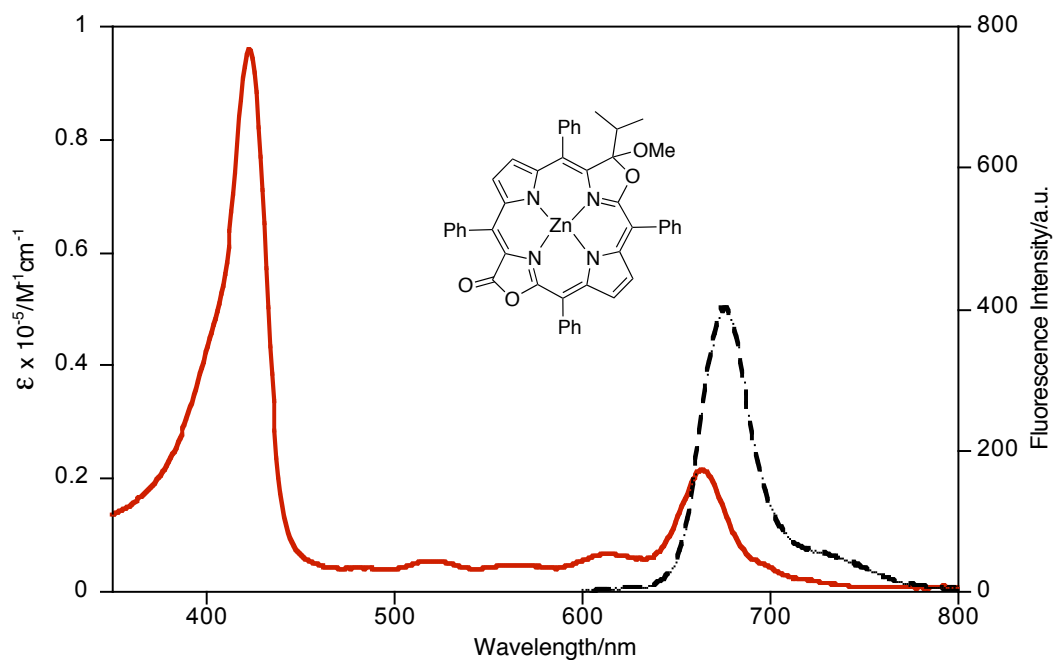

**Figure 21.** UV-vis (solid red trace) and fluorescence (broken black trace) spectra of **16Zn-cis** ( $\text{CH}_2\text{Cl}_2$ )

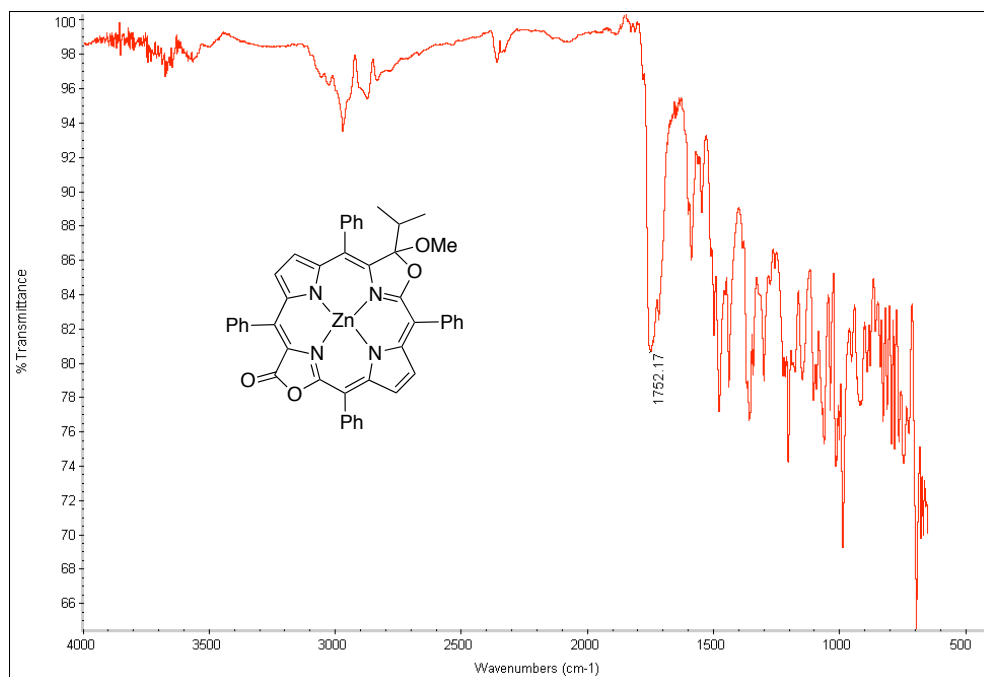

**Figure 22.** FT-IR spectrum (neat, diffuse reflectance) of **16Zn-cis**

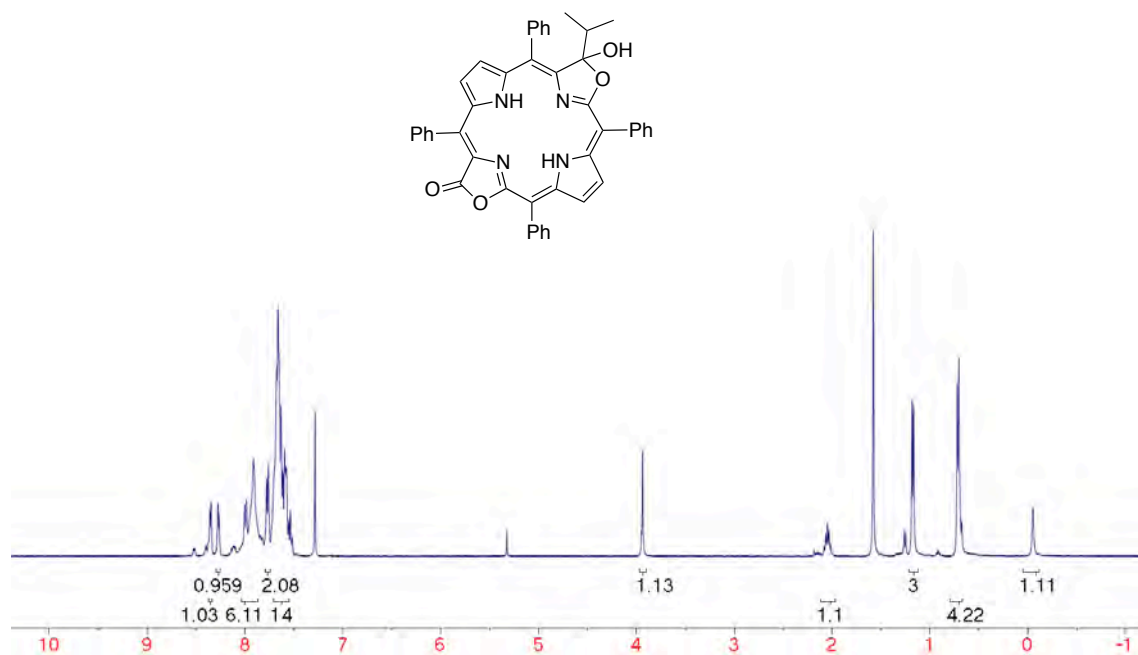

**Figure 23.**  $^1\text{H}$  NMR spectrum (400 MHz,  $\text{CDCl}_3$ ) of **18-cis**

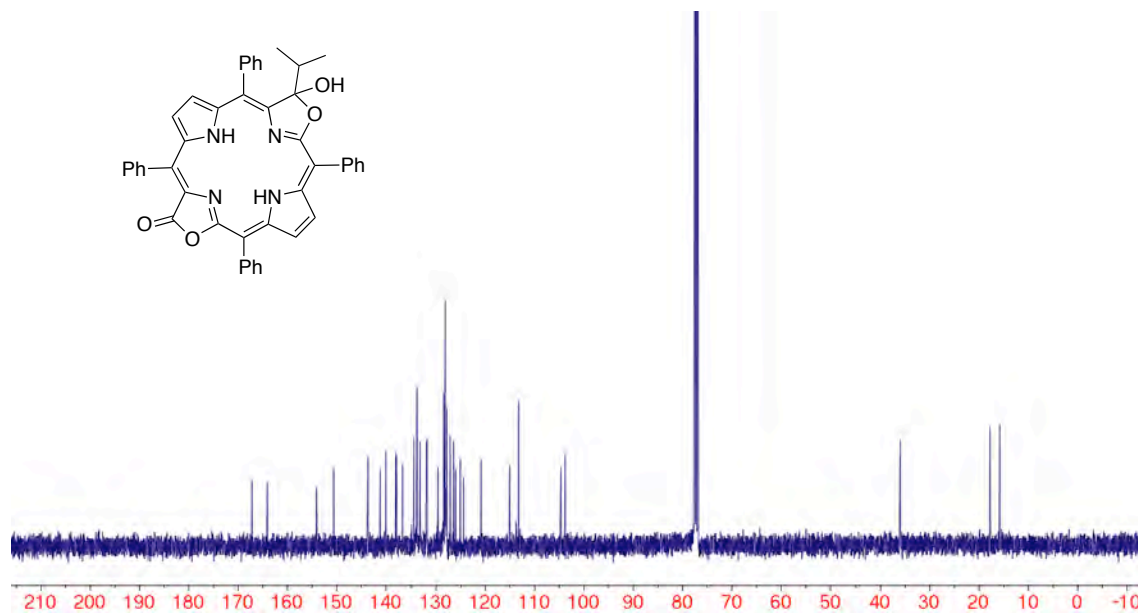

**Figure 24.**  $^{13}\text{C}$  NMR spectrum (100 MHz,  $\text{CDCl}_3$ ) of **18-cis**

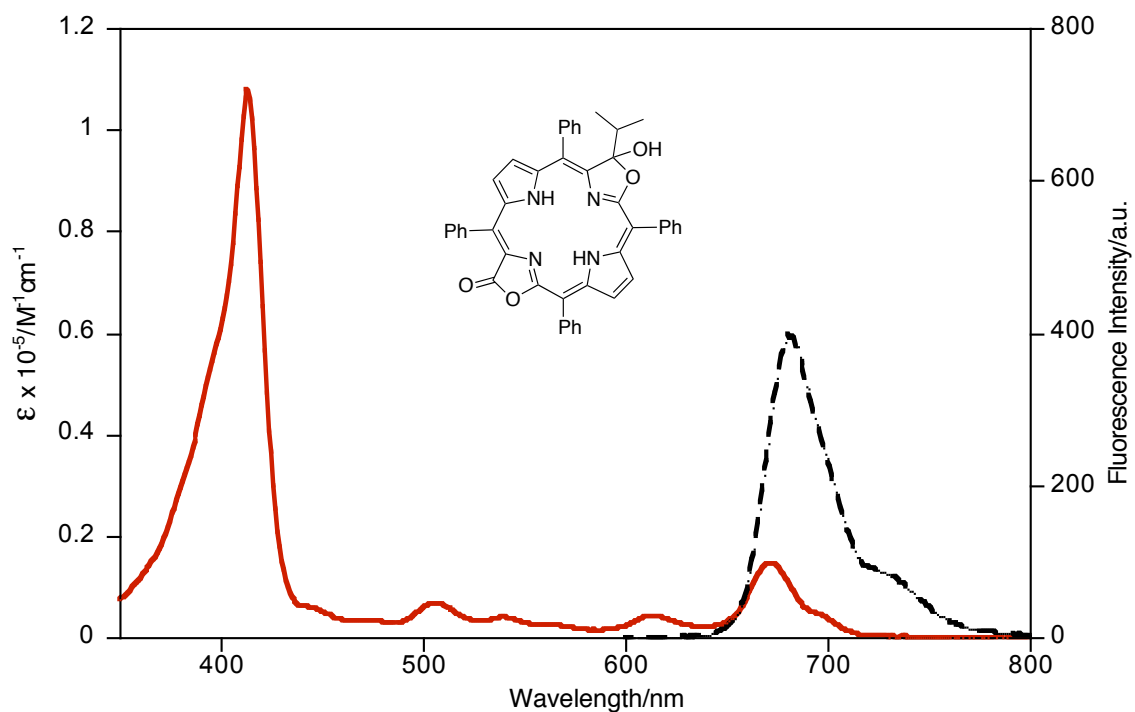

**Figure 25.** UV-vis (solid red trace) and fluorescence (broken black trace) spectra of **18-cis** ( $\text{CH}_2\text{Cl}_2$ )

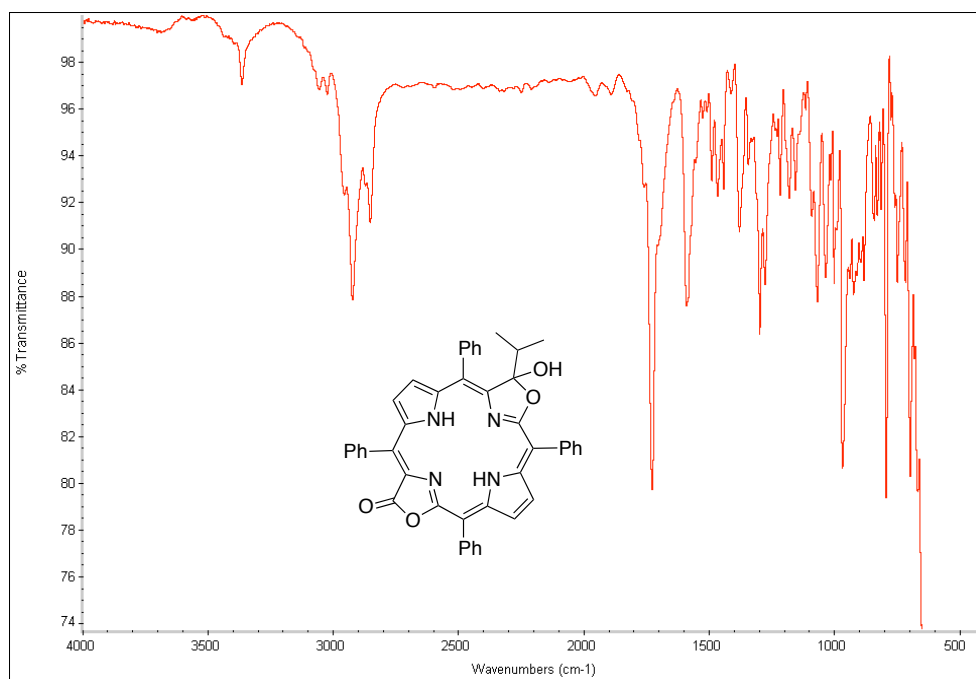

**Figure 26.** FT-IR spectrum (neat, diffuse reflectance) of **18-cis**



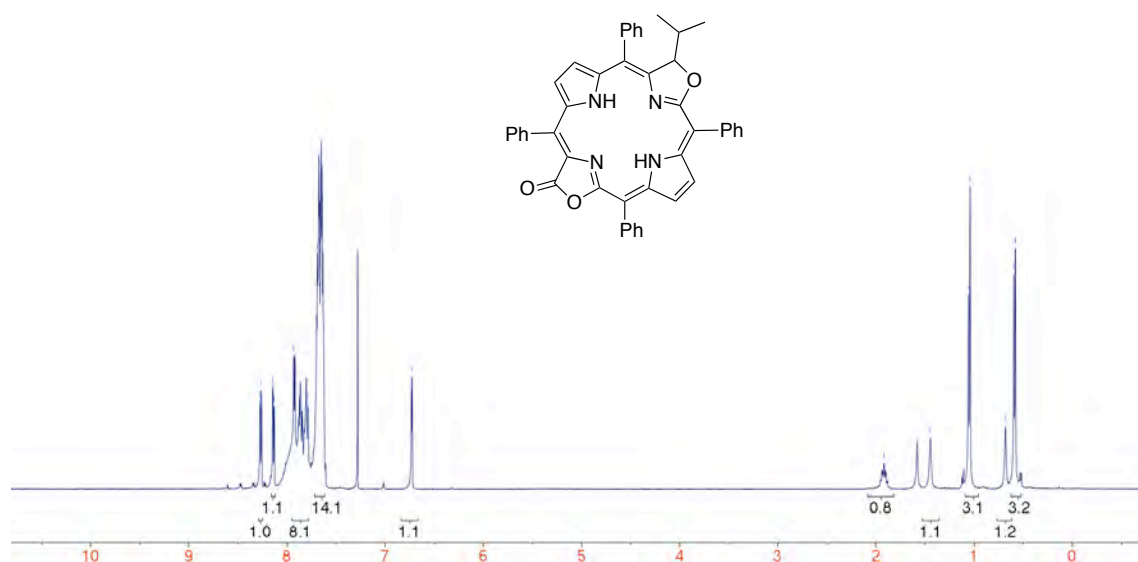

**Figure 27.**  $^1\text{H}$  NMR spectrum (400 MHz,  $\text{CDCl}_3$ ) of **19-cis**

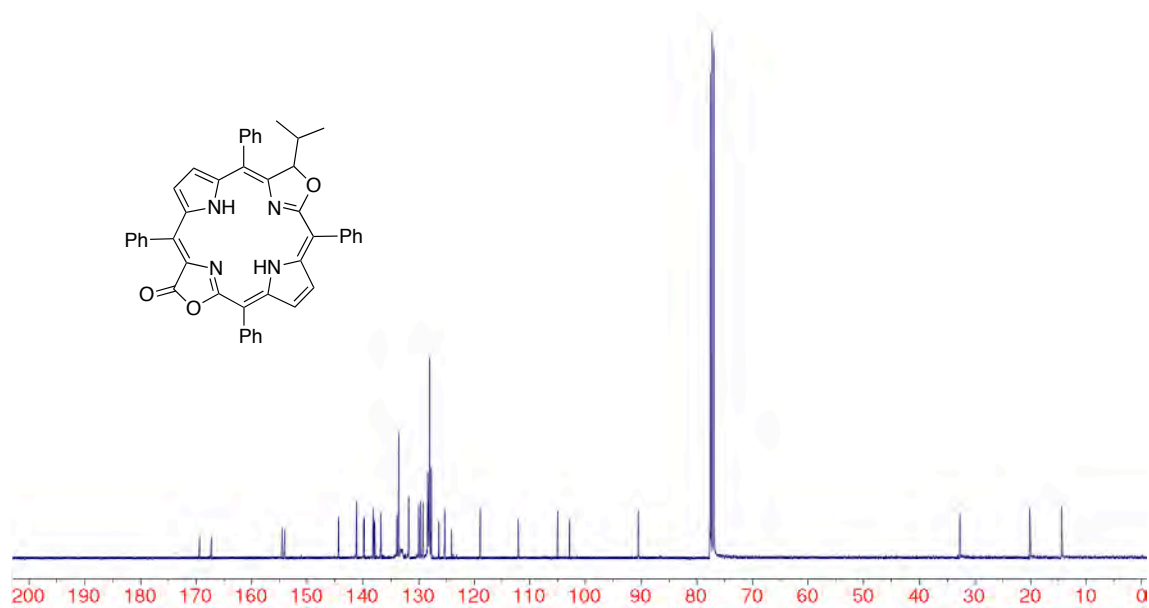

**Figure 28.**  $^{13}\text{C}$  NMR spectrum (100 MHz,  $\text{CDCl}_3$ ) of **19-cis**

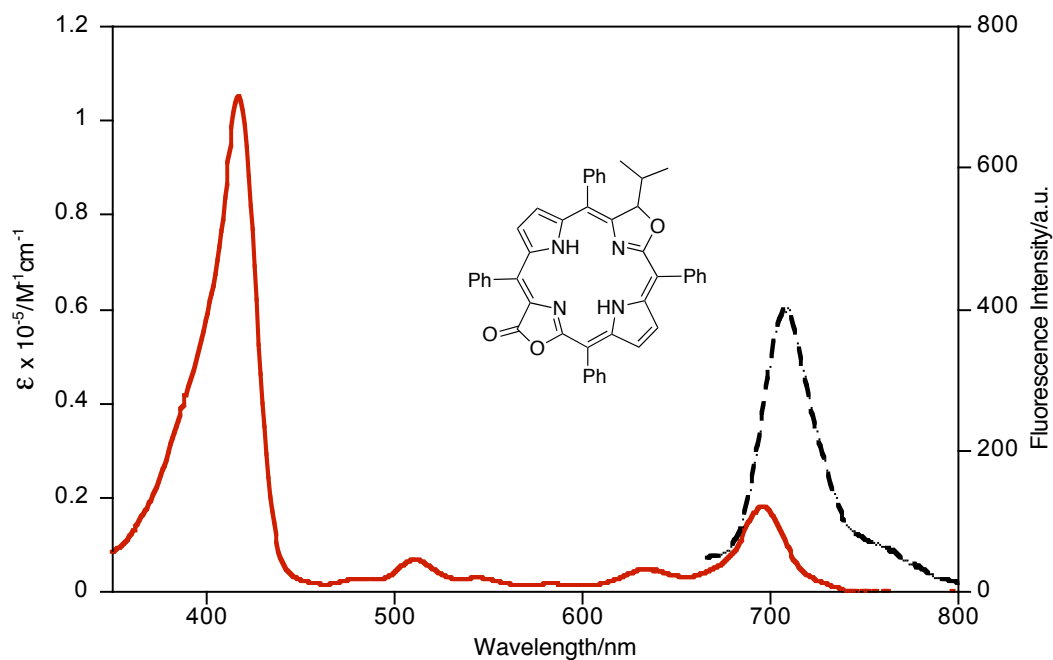

**Figure 29.** UV-vis (solid red trace) and fluorescence (broken black trace) spectra of **19-cis** ( $\text{CH}_2\text{Cl}_2$ )

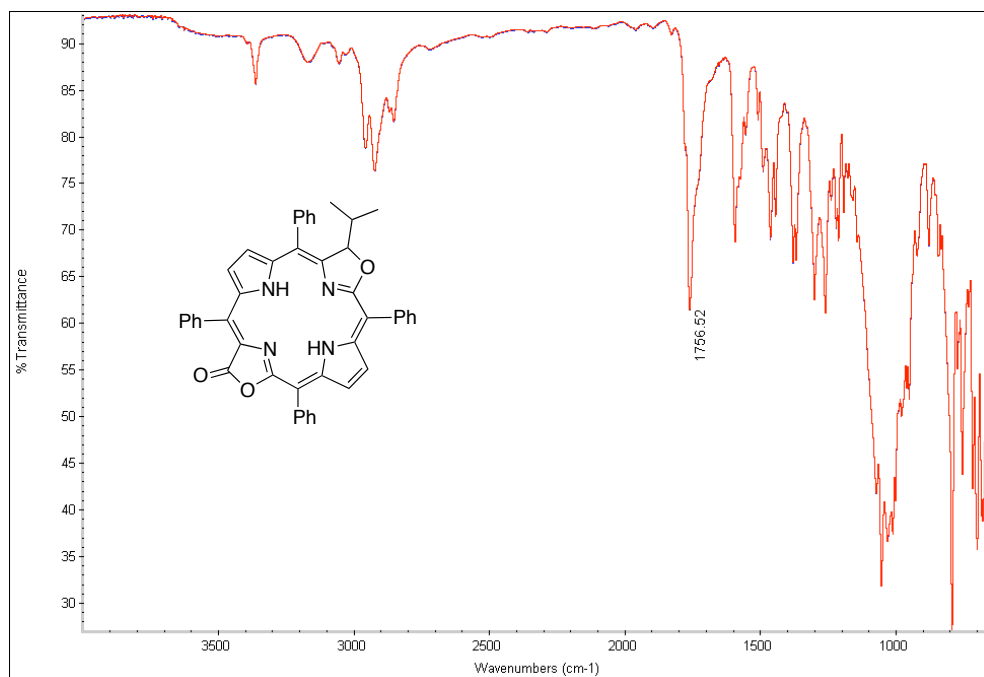

**Figure 30.** FT-IR spectrum (neat, diffuse reflectance) of **19-cis**

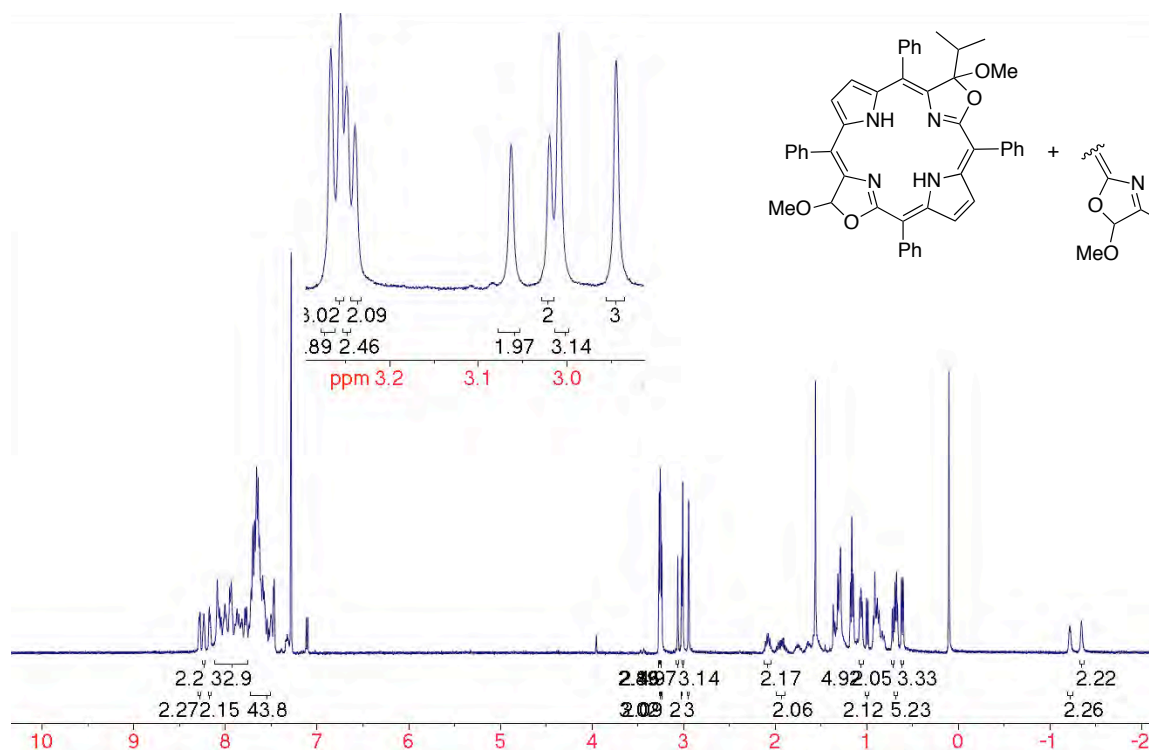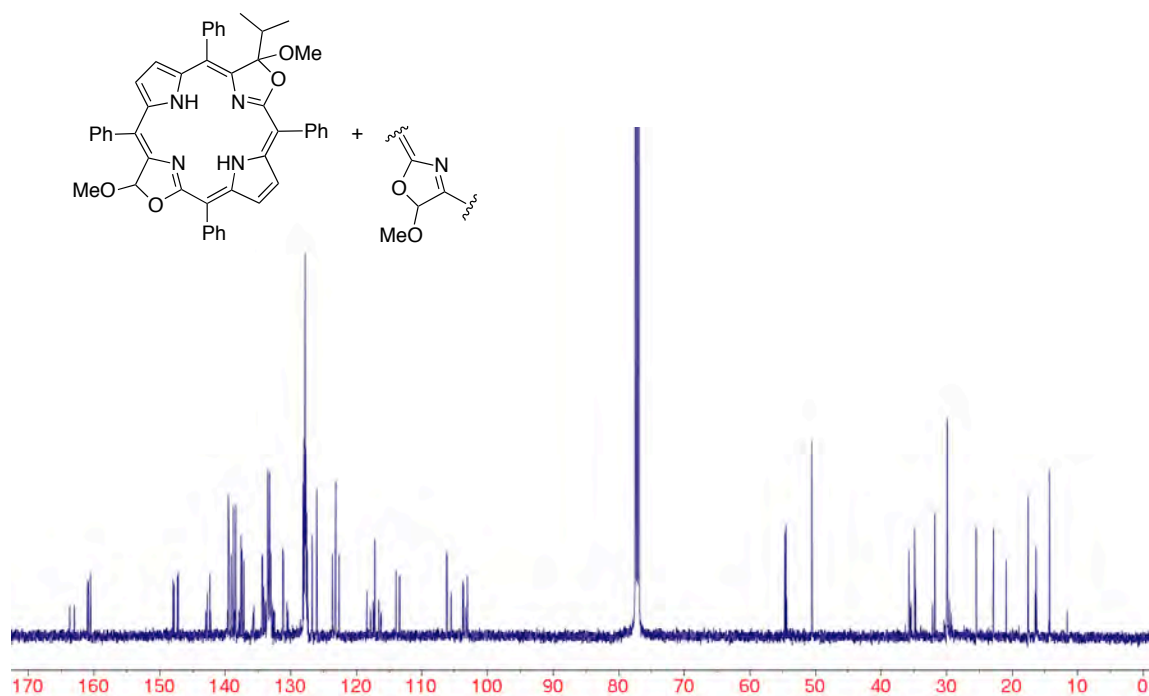

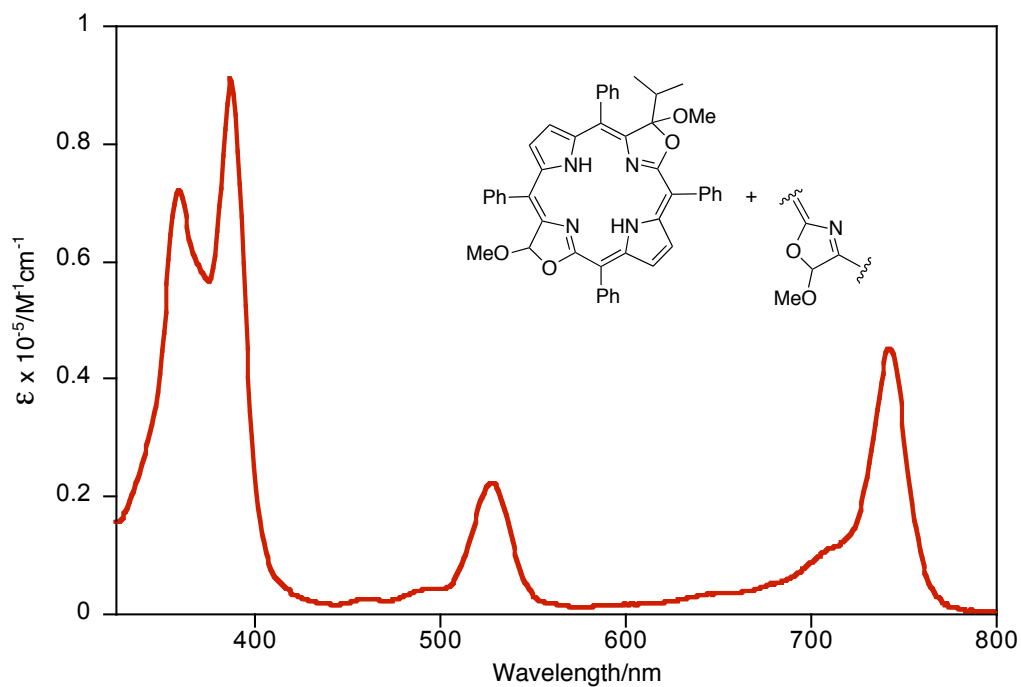

**Figure 33.** UV-vis spectrum of **23** ( $\text{CH}_2\text{Cl}_2$ , mixture of all isomers)

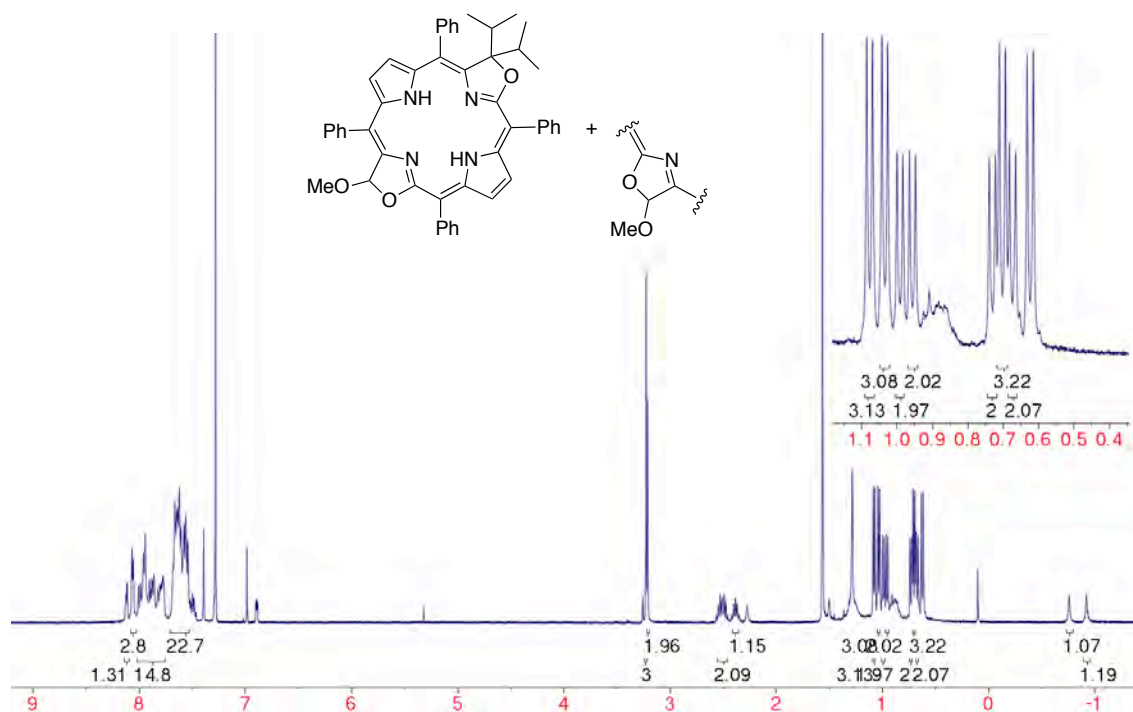

**Figure 34.**  $^1\text{H}$  NMR spectrum (400 MHz,  $\text{CDCl}_3$ ) of **22-cis** / **22-trans** (mixture, 3:2 favoring **22-cis**)

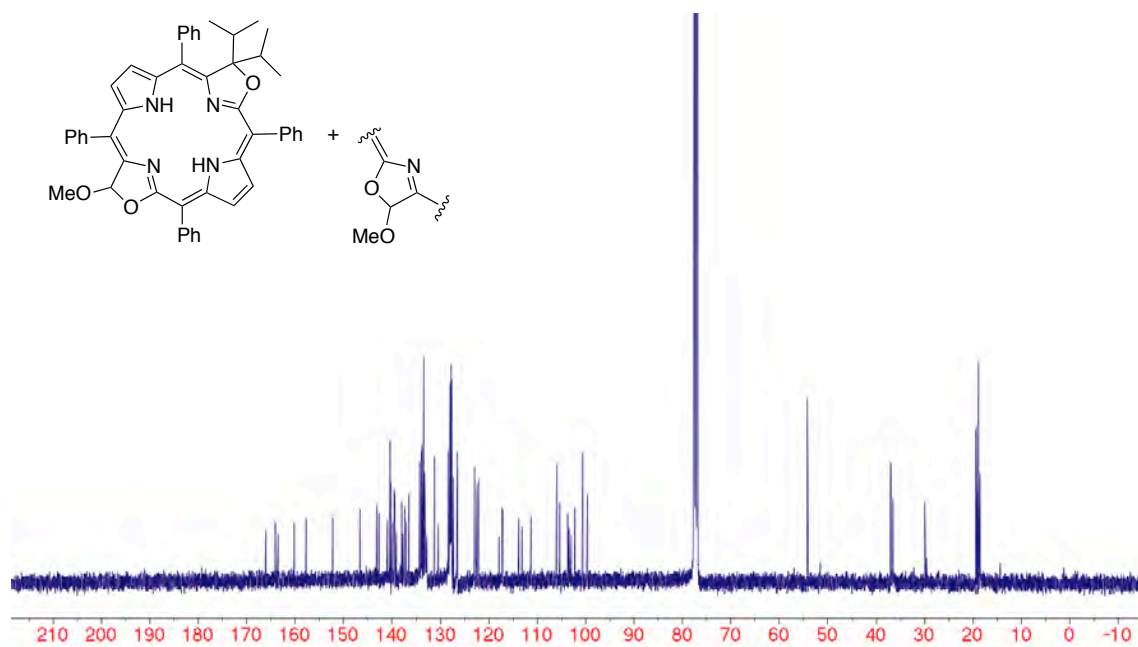

**Figure 35.**  $^{13}\text{C}$  NMR spectrum (100 MHz,  $\text{CDCl}_3$ ) of **22-cis** /**trans** (mixture, 3:2 favoring **22-cis** )

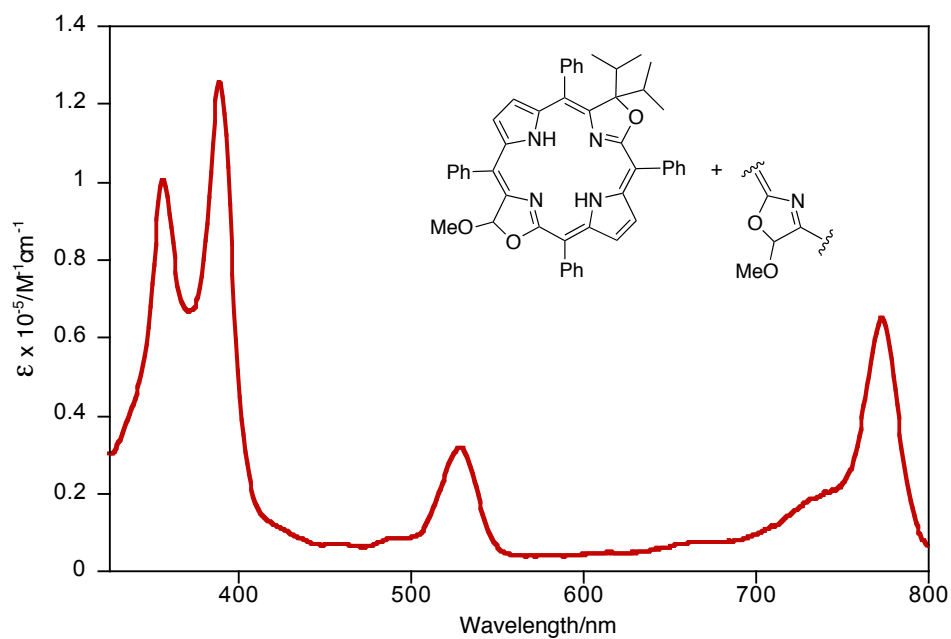

**Figure 36.** UV-vis spectrum of **22-cis** /**trans** ( $\text{CH}_2\text{Cl}_2$ , mixture, 3:2 favoring **22-cis** )

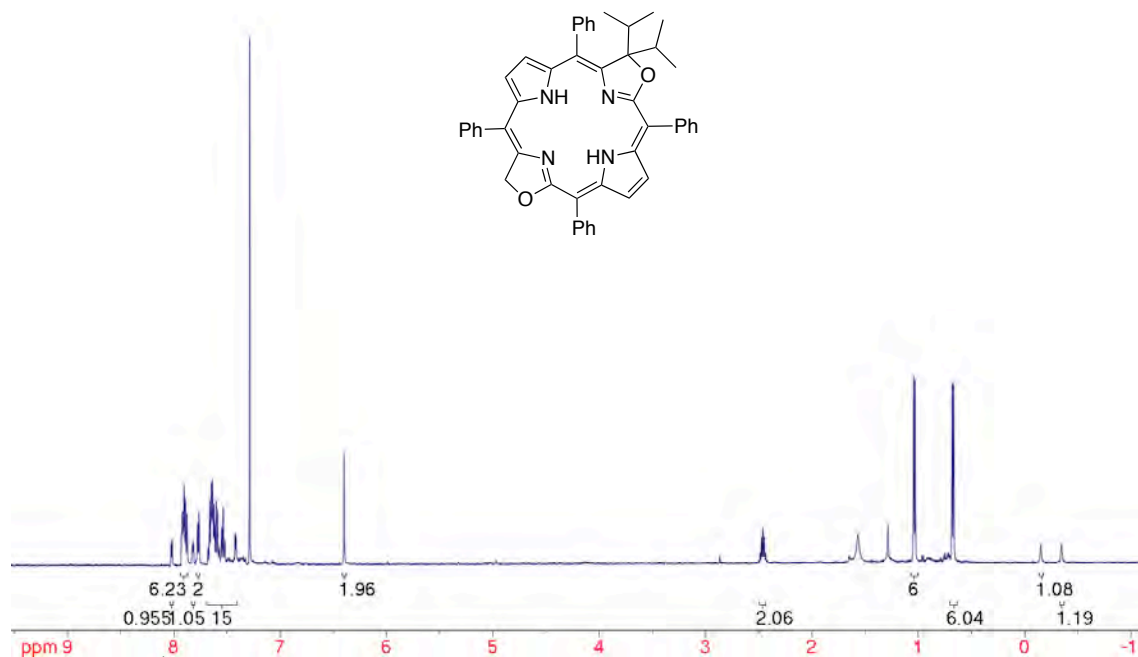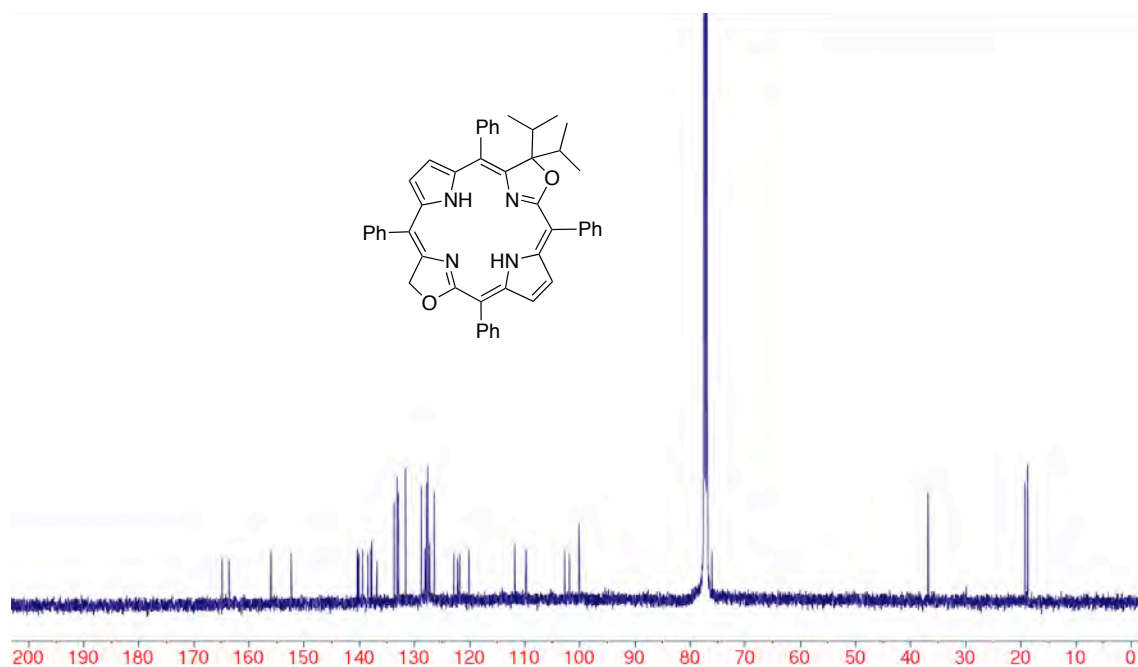

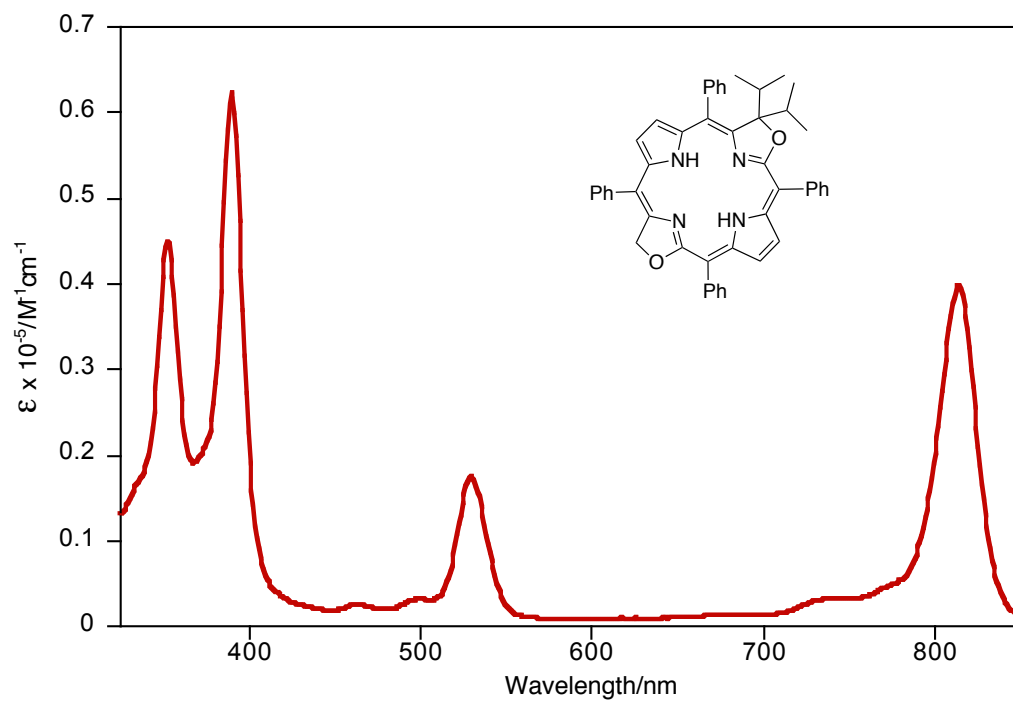

**Figure 39.** UV-vis spectrum of **24** ( $\text{CH}_2\text{Cl}_2$ )

## Crystal Structure Report for 14-cis

A red block-like specimen of **14-cis**, approximate dimensions 0.13 mm × 0.14 mm × 0.19 mm, was used for the X-ray crystallographic analysis. The X-ray intensity data were measured. The integration of the data using a monoclinic unit cell yielded a total of 20276 reflections to a maximum  $\theta$  angle of 62.99° (0.87 Å resolution), of which 5807 were independent (average redundancy 3.492, completeness = 96.5%,  $R_{\text{int}} = 4.80\%$ ,  $R_{\text{sig}} = 5.07\%$ ) and 4865 (83.78%) were greater than  $2\sigma(F^2)$ . The final cell constants of  $a = 11.4410(5)$  Å,  $b = 21.8550(10)$  Å,  $c = 18.5306(8)$  Å,  $\beta = 126.626(3)^\circ$ , volume = 3718.6(3) Å<sup>3</sup>, are based upon the refinement of the XYZ-centroids of reflections above 20  $\sigma(I)$ . The calculated minimum and maximum transmission coefficients (based on crystal size) are 0.8892 and 0.9220.

The structure was solved and refined using the Bruker SHELXTL Software Package, using the space group P2(1)/c, with  $Z = 4$  for the formula unit, C<sub>48</sub>H<sub>40</sub>N<sub>4</sub>O<sub>3</sub>. The final anisotropic full-matrix least-squares refinement on  $F^2$  with 573 variables converged at  $R1 = 8.74\%$ , for the observed data and  $wR2 = 23.24\%$  for all data. The goodness-of-fit was 1.082. The largest peak in the final difference electron density synthesis was 0.328 e<sup>-</sup>/Å<sup>3</sup> and the largest hole was -0.226 e<sup>-</sup>/Å<sup>3</sup> with an RMS deviation of 0.053 e<sup>-</sup>/Å<sup>3</sup>. On the basis of the final model, the calculated density was 1.288 g/cm<sup>3</sup> and  $F(000)$ , 1520 e<sup>-</sup>.



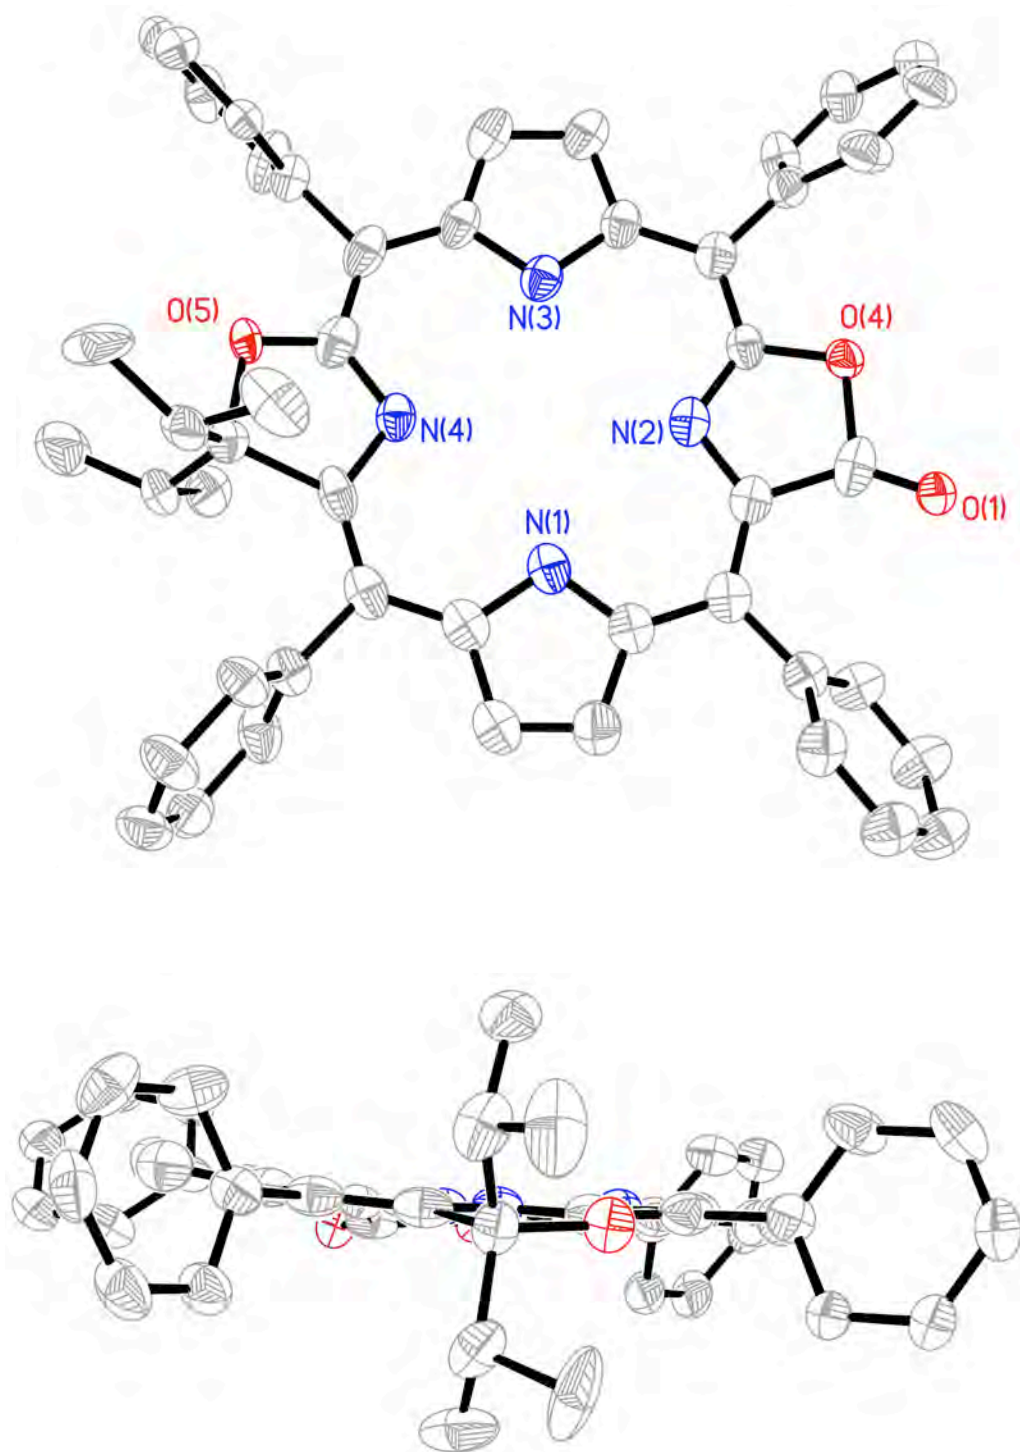

**Figure 40.** ORTEP Representation of the crystal structure of **14-*cis***, side and top views. Hydrogen atoms and disorder removed for clarity.

**Table S1.** Crystal data and structure refinement for **14-cis**.

|                                        |                                                                    |                            |
|----------------------------------------|--------------------------------------------------------------------|----------------------------|
| Identification code                    | <b>14-cis</b>                                                      |                            |
| Empirical formula                      | $C_{48}H_{40}N_4O_3$                                               |                            |
| Formula weight                         | 720.84                                                             |                            |
| Temperature                            | 100(2) K                                                           |                            |
| Wavelength                             | 1.54178 Å                                                          |                            |
| Crystal system                         | Monoclinic                                                         |                            |
| Space group                            | P2(1)/c                                                            |                            |
| Unit cell dimensions                   | $a = 11.4410(5) \text{ Å}$                                         | $\alpha = 90^\circ$        |
|                                        | $b = 21.8550(10) \text{ Å}$                                        | $\beta = 126.626(3)^\circ$ |
|                                        | $c = 18.5306(8) \text{ Å}$                                         | $\gamma = 90^\circ$        |
| Volume                                 | $3718.6(3) \text{ Å}^3$                                            |                            |
| Z                                      | 4                                                                  |                            |
| Density (calculated)                   | $1.288 \text{ Mg/m}^3$                                             |                            |
| Absorption coefficient                 | $0.640 \text{ mm}^{-1}$                                            |                            |
| F(000)                                 | 1520                                                               |                            |
| Crystal size                           | $0.19 \times 0.14 \times 0.13 \text{ mm}^3$                        |                            |
| Theta range for data collection        | 3.59 to $62.99^\circ$ .                                            |                            |
| Index ranges                           | $-13 \leq h \leq 11$ , $-25 \leq k \leq 22$ , $-21 \leq l \leq 20$ |                            |
| Reflections collected                  | 20276                                                              |                            |
| Independent reflections                | 5807 [ $R(\text{int}) = 0.0480$ ]                                  |                            |
| Completeness to $\theta = 62.99^\circ$ | 96.5 %                                                             |                            |
| Absorption correction                  | SADABS                                                             |                            |
| Max. and min. transmission             | 0.9220 and 0.8892                                                  |                            |
| Refinement method                      | Full-matrix least-squares on $F^2$                                 |                            |
| Data / restraints / parameters         | 5807 / 0 / 573                                                     |                            |
| Goodness-of-fit on $F^2$               | 1.082                                                              |                            |
| Final R indices [ $I > 2\sigma(I)$ ]   | $R1 = 0.0874$ , $wR2 = 0.2245$                                     |                            |
| R indices (all data)                   | $R1 = 0.0987$ , $wR2 = 0.2324$                                     |                            |
| Largest diff. peak and hole            | 0.328 and $-0.226 \text{ e.Å}^{-3}$                                |                            |

## Crystal Structure Report for 16-cis

A red plate-like specimen of **16-cis**, approximate dimensions 0.08 mm × 0.22 mm × 0.28 mm, was used for the X-ray crystallographic analysis. The X-ray intensity data were measured.

The integration of the data using a monoclinic unit cell yielded a total of 21363 reflections to a maximum  $\theta$  angle of  $64.61^\circ$  (0.85 Å resolution), of which 6046 were independent (average redundancy 3.533, completeness = 96.4%,  $R_{\text{int}} = 3.03\%$ ,  $R_{\text{sig}} = 2.87\%$ ) and 5127 (84.80%) were greater than  $2\sigma(F^2)$ . The final cell constants of  $a = 23.6921(5)$  Å,  $b = 13.7480(3)$  Å,  $c = 25.7494(8)$  Å,  $\beta = 117.2340(10)^\circ$ , volume =  $7457.3(3)$  Å<sup>3</sup>, are based upon the refinement of the XYZ-centroids of reflections above  $20\sigma(I)$ . Data were corrected for absorption effects using the multi-scan method (SADABS). The ratio of minimum to maximum apparent transmission was 0.871. The calculated minimum and maximum transmission coefficients (based on crystal size) are 0.8320 and 0.9473.

The structure was solved and refined using the Bruker SHELXTL Software Package, using the space group  $C 1 2/c 1$ , with  $Z = 4$  for the formula unit,  $C_{97}H_{77}N_9O_8$ . The final anisotropic full-matrix least-squares refinement on  $F^2$  with 518 variables converged at  $R1 = 5.16\%$ , for the observed data and  $wR2 = 15.51\%$  for all data. The goodness-of-fit was 0.967. The largest peak in the final difference electron density synthesis was  $0.797\text{ e}^-/\text{\AA}^3$  and the largest hole was  $-0.386\text{ e}^-/\text{\AA}^3$  with an RMS deviation of  $0.056\text{ e}^-/\text{\AA}^3$ . On the basis of the final model, the calculated density was  $1.333\text{ g/cm}^3$  and  $F(000)$ , 3144  $e^-$ .

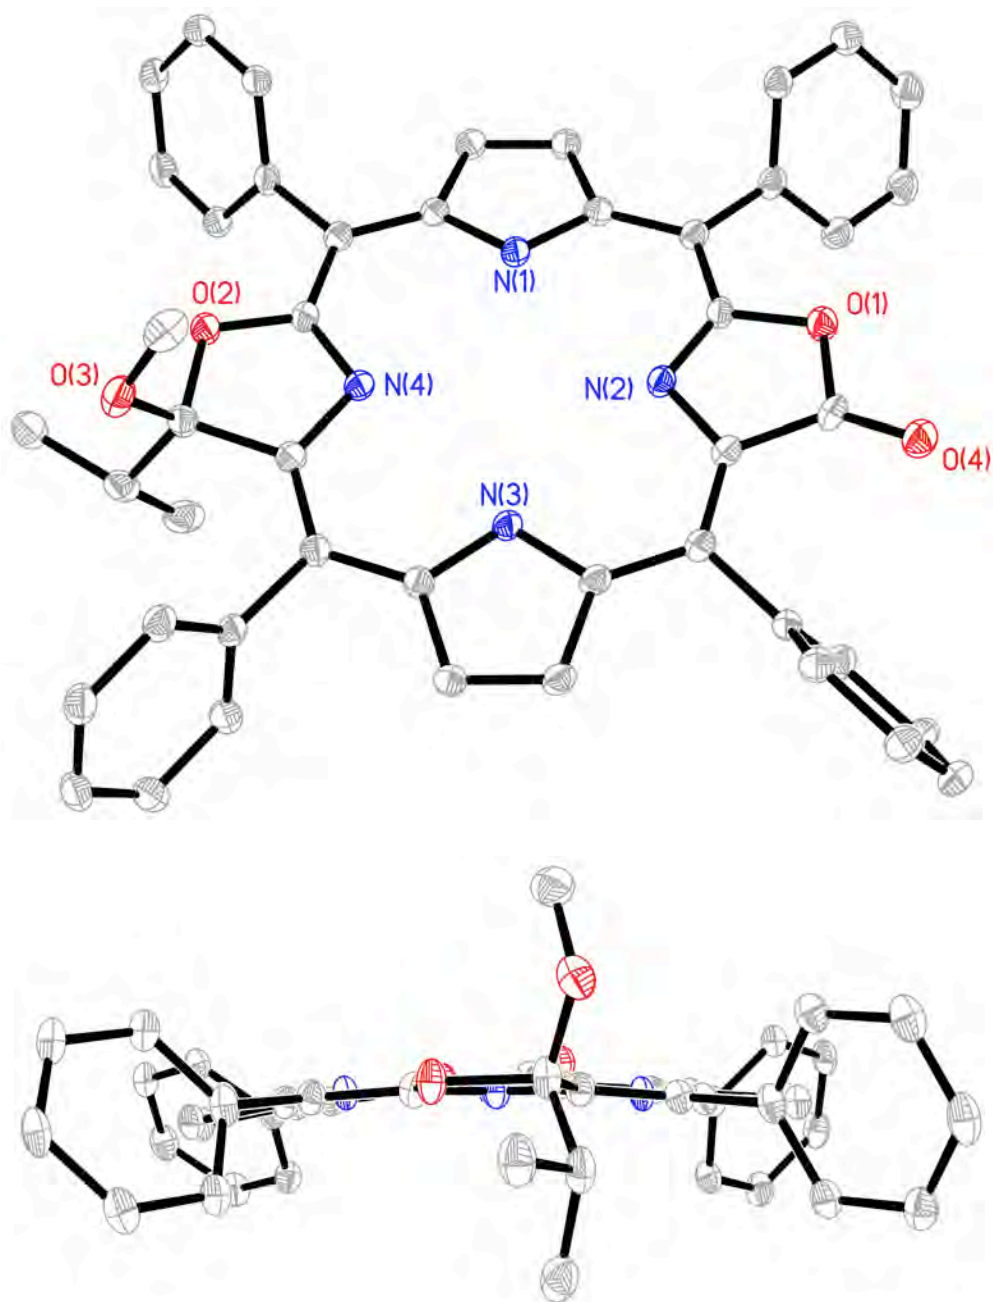

**Figure 41.** ORTEP Representation of the crystal structure of **16-cis**, side and top views. Hydrogen atoms and disorder removed for clarity.

**Table S2.** Crystal data and structure refinement for **16-cis**.

|                                   |                                                                                                        |
|-----------------------------------|--------------------------------------------------------------------------------------------------------|
| Identification code               | <b>16-cis</b>                                                                                          |
| Empirical formula                 | C <sub>97</sub> H <sub>77</sub> N <sub>9</sub> O <sub>8</sub>                                          |
| Formula weight                    | 1496.68                                                                                                |
| Temperature                       | 100(2) K                                                                                               |
| Wavelength                        | 1.54178 Å                                                                                              |
| Crystal system                    | Monoclinic                                                                                             |
| Space group                       | C2/c                                                                                                   |
| Unit cell dimensions              | a = 23.6921(5) Å     α = 90°<br>b = 13.7480(3) Å     β = 117.2340(10)°<br>c = 25.7494(8) Å     γ = 90° |
| Volume                            | 7457.3(3) Å <sup>3</sup>                                                                               |
| Z                                 | 4                                                                                                      |
| Density (calculated)              | 1.333 Mg/m <sup>3</sup>                                                                                |
| Absorption coefficient            | 0.684 mm <sup>-1</sup>                                                                                 |
| F(000)                            | 3144                                                                                                   |
| Crystal size                      | 0.28 × 0.22 × 0.08 mm <sup>3</sup>                                                                     |
| Theta range for data collection   | 3.84 to 64.61°.                                                                                        |
| Index ranges                      | -27 ≤ h ≤ 26, -16 ≤ k ≤ 16, -30 ≤ l ≤ 29                                                               |
| Reflections collected             | 21363                                                                                                  |
| Independent reflections           | 6046 [R(int) = 0.0303]                                                                                 |
| Completeness to theta = 64.61°    | 96.4 %                                                                                                 |
| Absorption correction             | SADABS                                                                                                 |
| Max. and min. transmission        | 0.9473 and 0.8320                                                                                      |
| Refinement method                 | Full-matrix least-squares on F <sup>2</sup>                                                            |
| Data / restraints / parameters    | 6046 / 0 / 518                                                                                         |
| Goodness-of-fit on F <sup>2</sup> | 0.967                                                                                                  |
| Final R indices [I > 2σ(I)]       | R1 = 0.0516, wR2 = 0.1466                                                                              |
| R indices (all data)              | R1 = 0.0607, wR2 = 0.1551                                                                              |
| Largest diff. peak and hole       | 0.797 and -0.386 e.Å <sup>-3</sup>                                                                     |

## Crystal Structure Report for 16Zn-cis

A green specimen of **16Zn-cis**, approximate dimensions 0.27 mm × 0.47 mm × 0.55 mm, was used for the X-ray crystallographic analysis. The X-ray intensity data were measured.

The integration of the data using a triclinic unit cell yielded a total of 23334 reflections to a maximum  $\theta$  angle of  $61.00^\circ$  (0.88 Å resolution), of which 6348 were independent (average redundancy 3.676, completeness = 94.7%,  $R_{\text{int}} = 2.72\%$ ,  $R_{\text{sig}} = 2.19\%$ ) and 6109 (96.24%) were greater than  $2\sigma(F^2)$ . The final cell constants of  $a = 12.5921(4)$  Å,  $b = 12.9701(4)$  Å,  $c = 14.8500(5)$  Å,  $\alpha = 111.9920(10)^\circ$ ,  $\beta = 96.5610(10)^\circ$ ,  $\gamma = 97.7270(10)^\circ$ , volume =  $2192.37(12)$  Å<sup>3</sup>, are based upon the refinement of the XYZ-centroids of reflections above  $20\sigma(I)$ . The calculated minimum and maximum transmission coefficients (based on crystal size) are 0.5661 and 0.7434.

The structure was solved and refined using the Bruker SHELXTL Software Package, using the space group P -1, with  $Z = 2$  for the formula unit,  $\text{C}_{47}\text{H}_{38}\text{N}_4\text{O}_5\text{Zn}$ . The final anisotropic full-matrix least-squares refinement on  $F^2$  with 522 variables converged at  $R1 = 6.29\%$ , for the observed data and  $wR2 = 17.48\%$  for all data. The goodness-of-fit was 0.968. The largest peak in the final difference electron density synthesis was  $1.736\text{ e}^-/\text{\AA}^3$  and the largest hole was  $-0.441\text{ e}^-/\text{\AA}^3$  with an RMS deviation of  $0.080\text{ e}^-/\text{\AA}^3$ . On the basis of the final model, the calculated density was  $1.218\text{ g/cm}^3$  and  $F(000)$ , 836  $\text{e}^-$ .

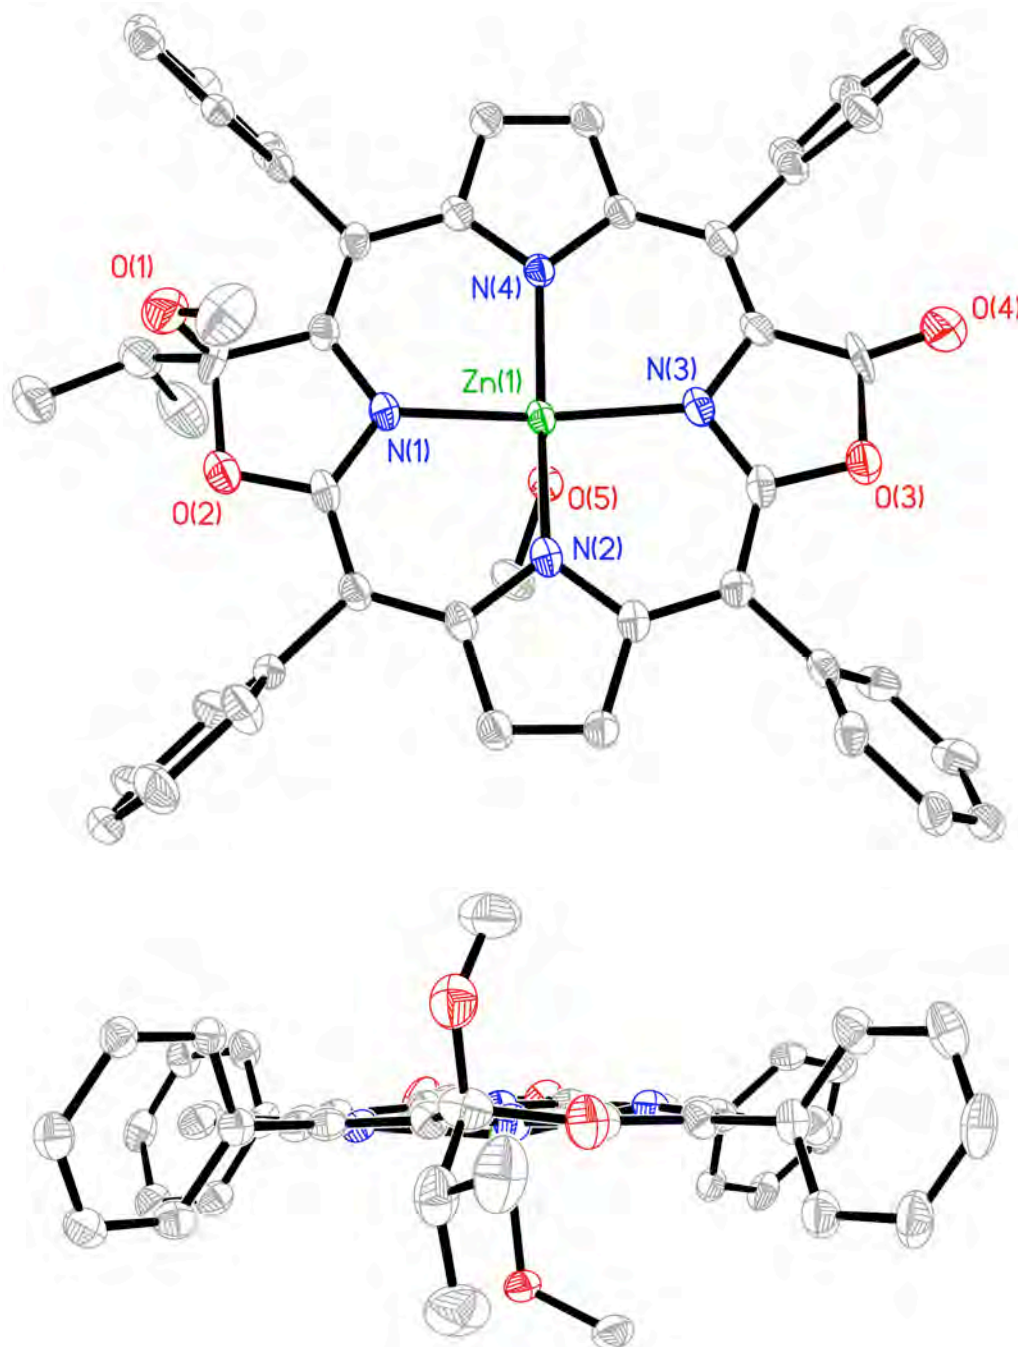

**Figure 42.** ORTEP Representation of the crystal structure of **16Zn-cis**, side and top views. Hydrogen atoms and disorder removed for clarity.

**Table S3.** Crystal data and structure refinement for **16Zn-cis**.

|                                   |                                                                  |                   |
|-----------------------------------|------------------------------------------------------------------|-------------------|
| Identification code               | <b>16Zn-cis</b>                                                  |                   |
| Empirical formula                 | C <sub>47</sub> H <sub>38</sub> N <sub>4</sub> O <sub>5</sub> Zn |                   |
| Formula weight                    | 804.18                                                           |                   |
| Temperature                       | 100(2) K                                                         |                   |
| Wavelength                        | 1.54178 Å                                                        |                   |
| Crystal system                    | Triclinic                                                        |                   |
| Space group                       | P1                                                               |                   |
| Unit cell dimensions              | a = 12.5921(4) Å                                                 | α = 111.9920(10)° |
|                                   | b = 12.9701(4) Å                                                 | β = 96.5610(10)°  |
|                                   | c = 14.8500(5) Å                                                 | γ = 97.7270(10)°  |
| Volume                            | 2192.36(12) Å <sup>3</sup>                                       |                   |
| Z                                 | 2                                                                |                   |
| Density (calculated)              | 1.218 Mg/m <sup>3</sup>                                          |                   |
| Absorption coefficient            | 1.163 mm <sup>-1</sup>                                           |                   |
| F(000)                            | 836                                                              |                   |
| Crystal size                      | 0.55 × 0.47 × 0.27 mm                                            |                   |
| Theta range for data collection   | 3.26 to 61.00°.                                                  |                   |
| Index ranges                      | -14 ≤ h ≤ 14, -14 ≤ k ≤ 11, -16 ≤ l ≤ 16                         |                   |
| Reflections collected             | 23334                                                            |                   |
| Independent reflections           | 6348 [R(int) = 0.0272]                                           |                   |
| Completeness to theta = 61.00°    | 94.7 %                                                           |                   |
| Absorption correction             | SADABS                                                           |                   |
| Max. and min. transmission        | 0.7434 and 0.5661                                                |                   |
| Refinement method                 | Full-matrix least-squares on F <sup>2</sup>                      |                   |
| Data / restraints / parameters    | 6348 / 0 / 522                                                   |                   |
| Goodness-of-fit on F <sup>2</sup> | 0.968                                                            |                   |
| Final R indices [I > 2σ(I)]       | R1 = 0.0629, wR2 = 0.1734                                        |                   |
| R indices (all data)              | R1 = 0.0645, wR2 = 0.1748                                        |                   |
| Largest diff. peak and hole       | 1.736 and -0.441 e.Å <sup>-3</sup>                               |                   |



## Crystal Structure Report for **23-trans-E**

An orange plate-like specimen of **23-trans-E**, approximate dimensions 0.09 mm × 0.10 mm × 0.21 mm, was used for the X-ray crystallographic analysis. The X-ray intensity data were measured.

The total exposure time was 33.52 hours. The frames were integrated with the Bruker SAINT software package using a narrow-frame algorithm. The integration of the data using an orthorhombic unit cell yielded a total of 42976 reflections to a maximum  $\theta$  angle of 63.00° (0.87 Å resolution), of which 6168 were independent (average redundancy 6.968, completeness = 100.0%,  $R_{\text{int}} = 7.20\%$ ,  $R_{\text{sig}} = 4.31\%$ ) and 5590 (90.63%) were greater than  $2\sigma(F^2)$ . The final cell constants of  $a = 9.4468(2)$  Å,  $b = 13.2846(3)$  Å,  $c = 30.4999(7)$  Å, volume = 3827.64(15) Å<sup>3</sup>, are based upon the refinement of the XYZ-centroids of 9852 reflections above  $20\sigma(I)$  with  $5.795^\circ < 2\theta < 123.8^\circ$ . Data were corrected for absorption effects using the multi-scan method (SADABS). The ratio of minimum to maximum apparent transmission was 0.854. The calculated minimum and maximum transmission coefficients (based on crystal size) are 0.8772 and 0.9438.

The structure was solved and refined using the Bruker SHELXTL Software Package, using the space group P2(1)2(1)2(1), with  $Z = 4$  for the formula unit, C<sub>47</sub>H<sub>40</sub>N<sub>4</sub>O<sub>4</sub>. The final anisotropic full-matrix least-squares refinement on F<sup>2</sup> with 519 variables converged at  $R1 = 8.08\%$ , for the observed data and  $wR2 = 22.13\%$  for all data. The goodness-of-fit was 0.945. The largest peak in the final difference electron density synthesis was 1.354 e<sup>-</sup>/Å<sup>3</sup> and the largest hole was -0.389 e<sup>-</sup>/Å<sup>3</sup> with an RMS deviation of 0.073 e<sup>-</sup>/Å<sup>3</sup>. On the basis of the final model, the calculated density was 1.258 g/cm<sup>3</sup> and F(000), 1528 e<sup>-</sup>.

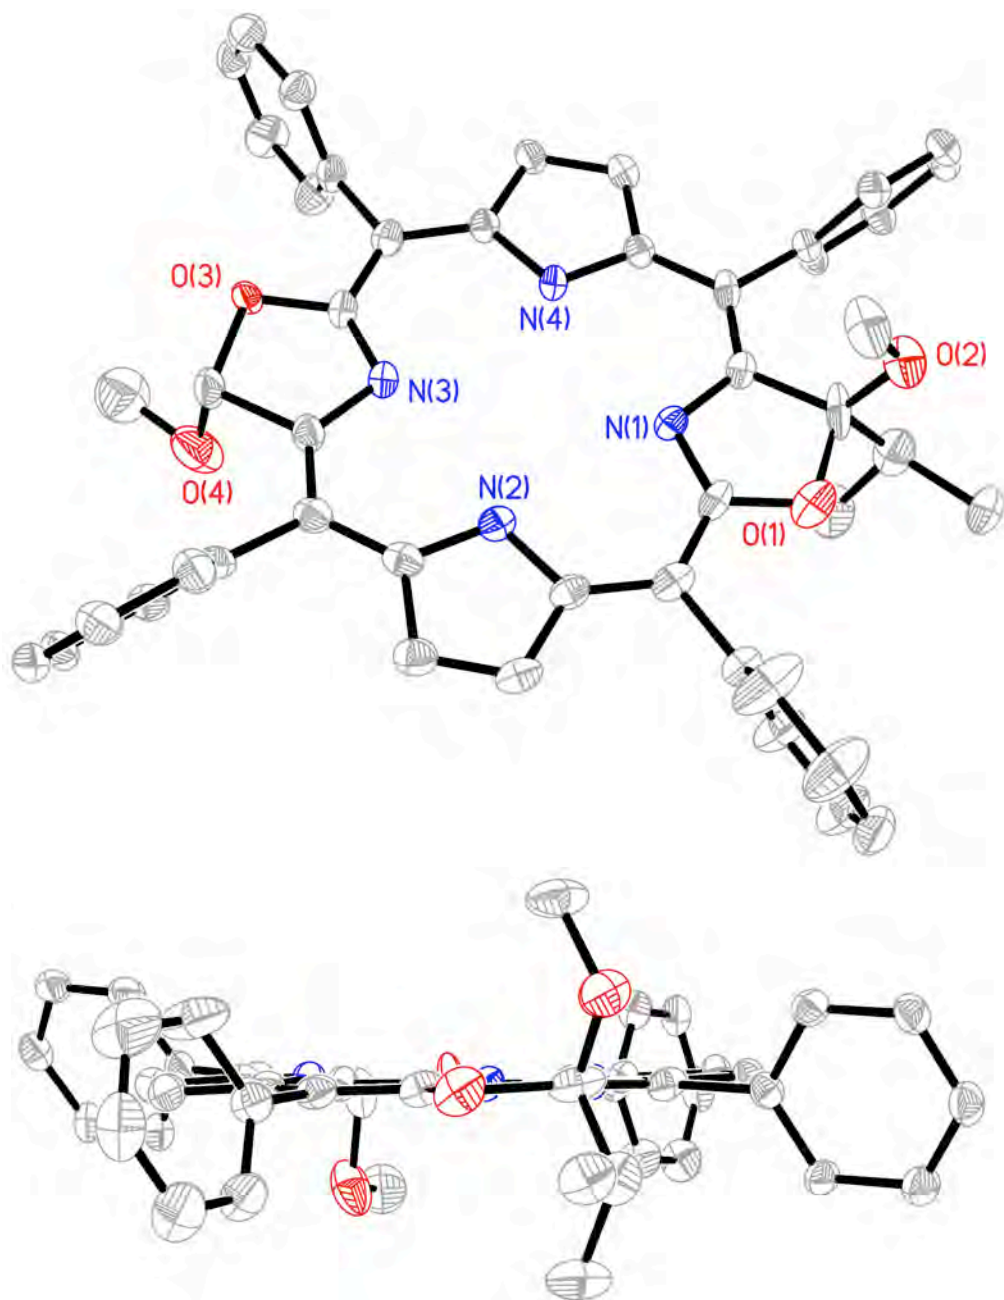

**Figure 43.** ORTEP Representation of the crystal structure of **23-trans-E**, side and top views. Hydrogen atoms and disorder removed for clarity.

**Table S4.** Crystal data and structure refinement for **23-trans-E**

|                                   |                                                               |         |
|-----------------------------------|---------------------------------------------------------------|---------|
| Identification code               | <b>23-trans-E</b>                                             |         |
| Empirical formula                 | C <sub>47</sub> H <sub>40</sub> N <sub>4</sub> O <sub>4</sub> |         |
| Formula weight                    | 724.83                                                        |         |
| Temperature                       | 100(2) K                                                      |         |
| Wavelength                        | 1.54178 Å                                                     |         |
| Crystal system                    | Orthorhombic                                                  |         |
| Space group                       | P2(1)2(1)2(1)                                                 |         |
| Unit cell dimensions              | a = 9.4468(2) Å                                               | α = 90° |
|                                   | b = 13.2846(3) Å                                              | β = 90° |
|                                   | c = 30.4999(7) Å                                              | γ = 90° |
| Volume                            | 3827.64(15) Å <sup>3</sup>                                    |         |
| Z                                 | 4                                                             |         |
| Density (calculated)              | 1.258 Mg/m <sup>3</sup>                                       |         |
| Absorption coefficient            | 0.644 mm <sup>-1</sup>                                        |         |
| F(000)                            | 1528                                                          |         |
| Crystal size                      | 0.21 × 0.10 × 0.09 mm <sup>3</sup>                            |         |
| Theta range for data collection   | 2.90 to 63.00°.                                               |         |
| Index ranges                      | -9 ≤ h ≤ 10, -15 ≤ k ≤ 15, -35 ≤ l ≤ 35                       |         |
| Reflections collected             | 42976                                                         |         |
| Independent reflections           | 6168 [R(int) = 0.0720]                                        |         |
| Completeness to theta = 63.00°    | 100.0 %                                                       |         |
| Absorption correction             | SADABS                                                        |         |
| Max. and min. transmission        | 0.9437 and 0.8772                                             |         |
| Refinement method                 | Full-matrix least-squares on F <sup>2</sup>                   |         |
| Data / restraints / parameters    | 6168 / 24 / 519                                               |         |
| Goodness-of-fit on F <sup>2</sup> | 0.945                                                         |         |
| Final R indices [I > 2σ(I)]       | R1 = 0.0808, wR2 = 0.2144                                     |         |
| R indices (all data)              | R1 = 0.0876, wR2 = 0.2213                                     |         |
| Absolute structure parameter      | 0.9(6)                                                        |         |
| Largest diff. peak and hole       | 1.354 and -0.389 e.Å <sup>-3</sup>                            |         |

## Crystal Structure Report for **23-trans-Z**

A orange specimen of **23-trans-Z**, approximate dimensions 0.18 mm × 0.24 mm × 0.28 mm, was used for the X-ray crystallographic analysis. The X-ray intensity data were measured.

The total exposure time was 38.48 hours. The frames were integrated with the Bruker SAINT software package using a narrow-frame algorithm. The integration of the data using a monoclinic unit cell yielded a total of 37579 reflections to a maximum  $\theta$  angle of  $61.98^\circ$  (0.87 Å resolution), of which 5901 were independent (average redundancy 6.368, completeness = 99.8%,  $R_{\text{int}} = 4.98\%$ ,  $R_{\text{sig}} = 3.56\%$ ) and 4716 (79.92%) were greater than  $2\sigma(F^2)$ . The final cell constants of  $a = 20.5804(4)$  Å,  $b = 9.5370(2)$  Å,  $c = 19.1964(4)$  Å,  $\beta = 91.8000(10)^\circ$ , volume =  $3765.92(13)$  Å<sup>3</sup>, are based upon the refinement of the XYZ-centroids of 164 reflections above  $20\sigma(I)$  with  $17.70^\circ < 2\theta < 97.69^\circ$ . Data were corrected for absorption effects using the multi-scan method (SADABS). The ratio of minimum to maximum apparent transmission was 0.824. The calculated minimum and maximum transmission coefficients (based on crystal size) are 0.8401 and 0.8891.

The structure was solved and refined using the Bruker SHELXTL Software Package, using the space group P 2(1)/c, with  $Z = 4$  for the formula unit, C<sub>47</sub>H<sub>40</sub>N<sub>4</sub>O<sub>4</sub>. The final anisotropic full-matrix least-squares refinement on  $F^2$  with 519 variables converged at  $R_1 = 8.14\%$ , for the observed data and  $wR_2 = 25.49\%$  for all data. The goodness-of-fit was 0.894. The largest peak in the final difference electron density synthesis was  $1.444\text{ e}^-/\text{\AA}^3$  and the largest hole was  $-0.439\text{ e}^-/\text{\AA}^3$  with an RMS deviation of  $0.064\text{ e}^-/\text{\AA}^3$ . On the basis of the final model, the calculated density was  $1.278\text{ g/cm}^3$  and  $F(000)$ , 1528 e<sup>-</sup>.

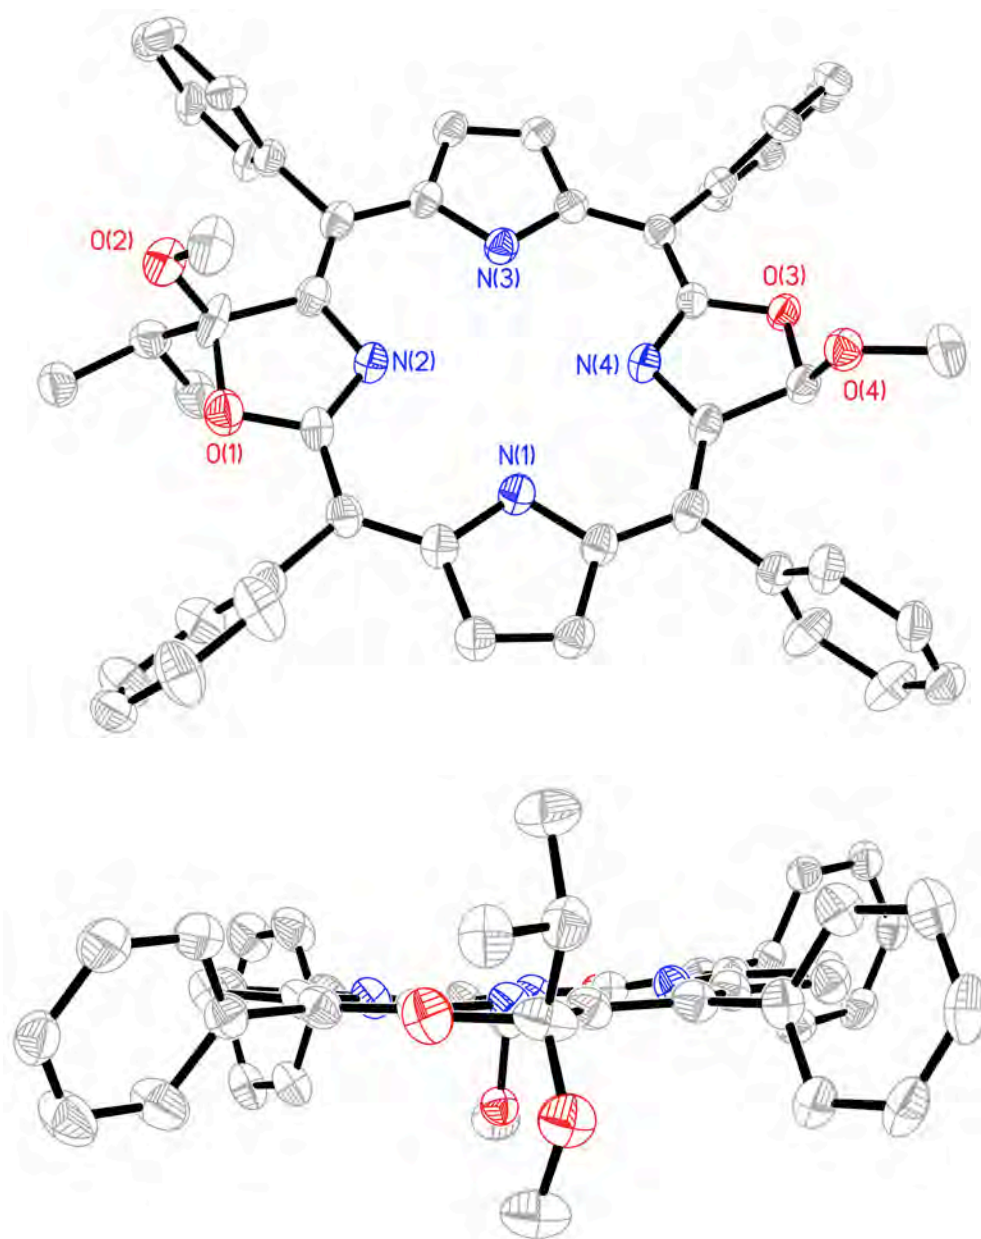

**Figure 44.** ORTEP Representation of the crystal structure of **23-*trans*-Z**, side and top views. Hydrogen atoms and disorder removed for clarity.

**Table S5.** Crystal data and structure refinement for **23-trans-Z**

|                                   |                                             |                           |
|-----------------------------------|---------------------------------------------|---------------------------|
| Identification code               | <b>23-trans-Z</b>                           |                           |
| Empirical formula                 | $C_{47}H_{40}N_4O_4$                        |                           |
| Formula weight                    | 724.83                                      |                           |
| Temperature                       | 100(2) K                                    |                           |
| Wavelength                        | 1.54178 Å                                   |                           |
| Crystal system                    | Monoclinic                                  |                           |
| Space group                       | P2(1)/c                                     |                           |
| Unit cell dimensions              | $a = 20.5804(4)$ Å                          | $\alpha = 90^\circ$       |
|                                   | $b = 9.5370(2)$ Å                           | $\beta = 91.80(10)^\circ$ |
|                                   | $c = 19.1964(4)$ Å                          | $\gamma = 90^\circ$       |
| Volume                            | 3765.92(13) Å <sup>3</sup>                  |                           |
| Z                                 | 4                                           |                           |
| Density (calculated)              | 1.278 Mg/m <sup>3</sup>                     |                           |
| Absorption coefficient            | 0.654 mm <sup>-1</sup>                      |                           |
| F(000)                            | 1528                                        |                           |
| Crystal size                      | 0.28 × 0.24 × 0.18 mm <sup>3</sup>          |                           |
| Theta range for data collection   | 4.30 to 61.98°.                             |                           |
| Index ranges                      | -23 ≤ h ≤ 23, -10 ≤ k ≤ 10, -21 ≤ l ≤ 20    |                           |
| Reflections collected             | 37579                                       |                           |
| Independent reflections           | 5901 [R(int) = 0.0498]                      |                           |
| Completeness to theta = 61.98°    | 99.8 %                                      |                           |
| Absorption correction             | None                                        |                           |
| Max. and min. transmission        | 0.8891 and 0.8401                           |                           |
| Refinement method                 | Full-matrix least-squares on F <sup>2</sup> |                           |
| Data / restraints / parameters    | 5901 / 0 / 519                              |                           |
| Goodness-of-fit on F <sup>2</sup> | 0.894                                       |                           |
| Final R indices [I > 2σ(I)]       | R1 = 0.0814, wR2 = 0.2308                   |                           |
| R indices (all data)              | R1 = 0.0970, wR2 = 0.2549                   |                           |
| Largest diff. peak and hole       | 1.444 and -0.439 e.Å <sup>-3</sup>          |                           |

## Crystal Structure Report for **22-cis**

A red specimen of **22-cis**, approximate dimensions 0.38 mm × 0.42 mm × 0.55 mm, was used for the X-ray crystallographic analysis. The X-ray intensity data were measured.

The integration of the data using a monoclinic unit cell yielded a total of 23323 reflections to a maximum  $\theta$  angle of  $64.45^\circ$  (0.85 Å resolution), of which 6350 were independent (average redundancy 3.673, completeness = 96.1%,  $R_{\text{int}} = 3.15\%$ ,  $R_{\text{sig}} = 2.24\%$ ) and 5451 (85.84%) were greater than  $2\sigma(F^2)$ . The final cell constants of  $a = 20.3320(5)$  Å,  $b = 11.1841(3)$  Å,  $c = 18.4019(5)$  Å,  $\beta = 109.5870(10)^\circ$ , volume =  $3942.36(18)$  Å<sup>3</sup>, are based upon the refinement of the XYZ-centroids of reflections above  $20\sigma(I)$ . The calculated minimum and maximum transmission coefficients (based on crystal size) are 0.7297 and 0.8006.

The structure was solved and refined using the Bruker SHELXTL Software Package, using the space group  $P2(1)/c$ , with  $Z = 4$  for the formula unit,  $C_{49}H_{44}N_4O_3$ . The final anisotropic full-matrix least-squares refinement on  $F^2$  with 585 variables converged at  $R1 = 8.25\%$ , for the observed data and  $wR2 = 26.74\%$  for all data. The goodness-of-fit was 1.037. The largest peak in the final difference electron density synthesis was  $1.341 \text{ e}^-/\text{\AA}^3$  and the largest hole was  $-0.423 \text{ e}^-/\text{\AA}^3$  with an RMS deviation of  $0.056 \text{ e}^-/\text{\AA}^3$ . On the basis of the final model, the calculated density was  $1.242 \text{ g/cm}^3$  and  $F(000)$ , 1560  $\text{e}^-$ .

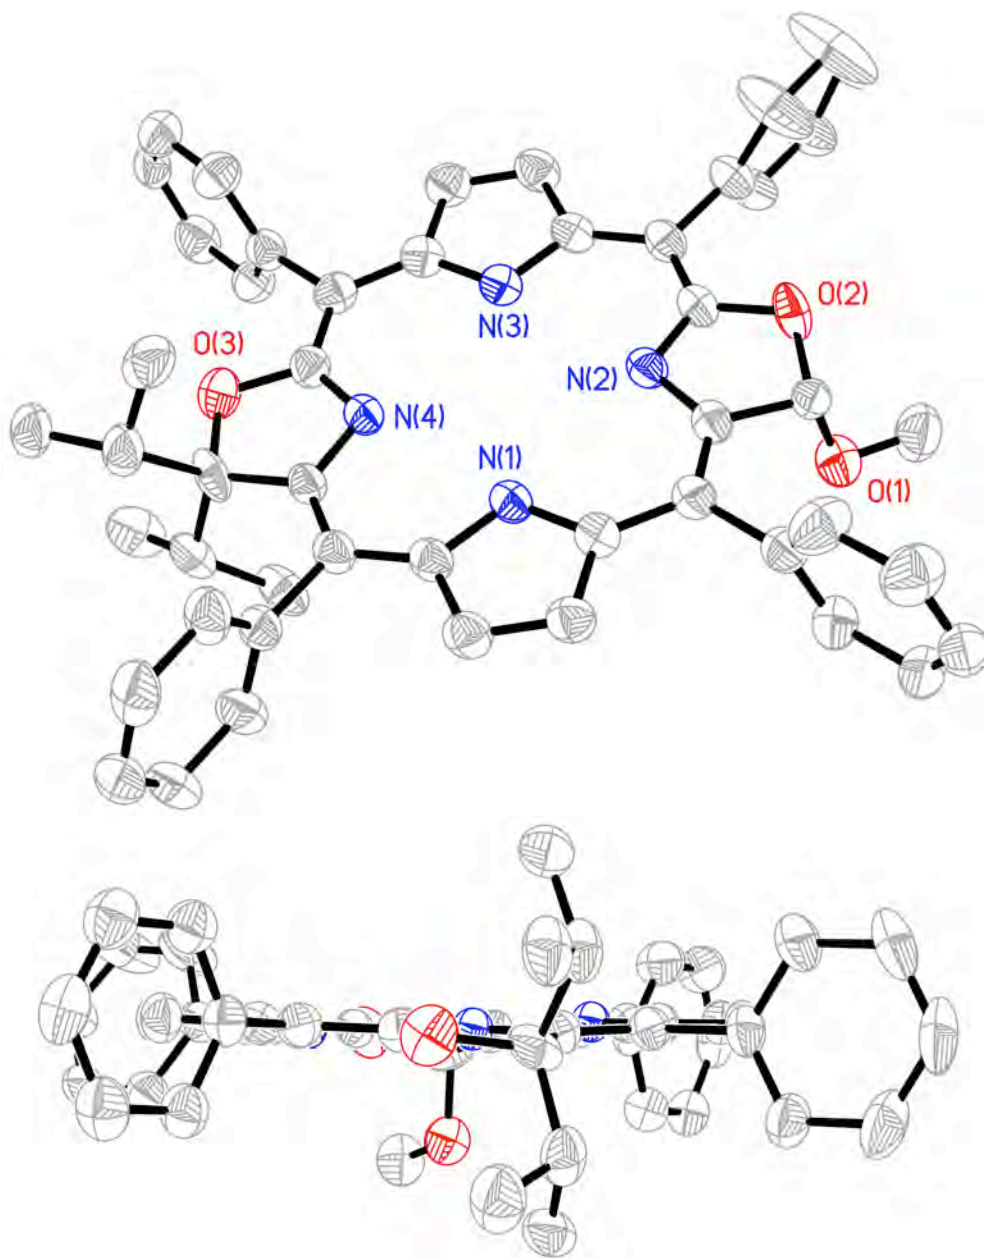

**Figure 45.** ORTEP Representation of the crystal structure of **22-cis** , side and top views. Hydrogen atoms and disorder removed for clarity.



**Table S6.** Crystal data and structure refinement for **22-cis**.

|                                        |                                                                    |                              |
|----------------------------------------|--------------------------------------------------------------------|------------------------------|
| Identification code                    | <b>22-cis</b>                                                      |                              |
| Empirical formula                      | $C_{49}H_{44}N_4O_3$                                               |                              |
| Formula weight                         | 736.88                                                             |                              |
| Temperature                            | 100(2) K                                                           |                              |
| Wavelength                             | 1.54178 Å                                                          |                              |
| Crystal system                         | Monoclinic                                                         |                              |
| Space group                            | P2(1)/c                                                            |                              |
| Unit cell dimensions                   | $a = 20.3320(5)$ Å                                                 | $\alpha = 90^\circ$          |
|                                        | $b = 11.1841(3)$ Å                                                 | $\beta = 109.5870(10)^\circ$ |
|                                        | $c = 18.4019(5)$ Å                                                 | $\gamma = 90^\circ$          |
| Volume                                 | $3942.36(18)$ Å <sup>3</sup>                                       |                              |
| Z                                      | 4                                                                  |                              |
| Density (calculated)                   | $1.242$ Mg/m <sup>3</sup>                                          |                              |
| Absorption coefficient                 | $0.613$ mm <sup>-1</sup>                                           |                              |
| F(000)                                 | 1560                                                               |                              |
| Crystal size                           | $0.55 \times 0.42 \times 0.38$ mm <sup>3</sup>                     |                              |
| Theta range for data collection        | 2.31 to $64.45^\circ$ .                                            |                              |
| Index ranges                           | $-23 \leq h \leq 22$ , $-12 \leq k \leq 11$ , $-20 \leq l \leq 19$ |                              |
| Reflections collected                  | 23323                                                              |                              |
| Independent reflections                | 6350 [R(int) = 0.0315]                                             |                              |
| Completeness to $\theta = 64.45^\circ$ | 96.1 %                                                             |                              |
| Absorption correction                  | SADABS                                                             |                              |
| Max. and min. transmission             | 0.8006 and 0.7297                                                  |                              |
| Refinement method                      | Full-matrix least-squares on F <sup>2</sup>                        |                              |
| Data / restraints / parameters         | 6350 / 6 / 585                                                     |                              |
| Goodness-of-fit on F <sup>2</sup>      | 1.037                                                              |                              |
| Final R indices [I > 2 $\sigma$ (I)]   | R1 = 0.0825, wR2 = 0.2563                                          |                              |
| R indices (all data)                   | R1 = 0.0904, wR2 = 0.2674                                          |                              |
| Largest diff. peak and hole            | $1.341$ and $-0.423$ e.Å <sup>-3</sup>                             |                              |
